1 **Title: Integrating Gut Microbiota and Host Immune Markers for Highly**  
2 **Accurate Diagnosis of *Clostridioides difficile* Infection**

3

4 **Authors:** Shanlin Ke<sup>1,2</sup>, Nira R. Pollock<sup>3,4</sup>, Xu-Wen Wang<sup>1</sup>, Xinhua Chen<sup>5</sup>, Kaitlyn Daugherty<sup>5</sup>,  
5 Qianyun Lin<sup>5</sup>, Hua Xu<sup>5</sup>, Kevin W. Garey<sup>6</sup>, Anne J. Gonzales-Luna<sup>6</sup>, Ciarán P. Kelly<sup>5\*</sup>, Yang-Yu  
6 Liu<sup>1,7\*</sup>

7 **Affiliations:**

8 <sup>1</sup>Channing Division of Network Medicine, Brigham and Women's Hospital and Harvard Medical  
9 School, Boston, Massachusetts 02115, USA.

10 <sup>2</sup>State Key Laboratory of Pig Genetic Improvement and Production Technology, Jiangxi  
11 Agricultural University 330045, China.

12 <sup>3</sup>Division of Infectious Diseases, Department of Medicine, Beth Israel Deaconess Medical  
13 Center, Boston, Massachusetts 02115, USA.

14 <sup>4</sup>Department of Laboratory Medicine, Boston Children's Hospital, Boston, Massachusetts 02115,  
15 USA.

16 <sup>5</sup>Division of Gastroenterology, Department of Medicine, Beth Israel Deaconess Medical Center,  
17 Boston, Massachusetts 02115, USA.

18 <sup>6</sup>Department of Pharmacy Practice and Translation Research, University of Houston College of  
19 Pharmacy, Houston, Texas 77204, USA.

20 <sup>7</sup>Center for Cancer Systems Biology, Dana-Farber Cancer Institute, Boston, Massachusetts  
21 02115, USA.

22 \*To whom correspondence should be addressed: Y.-Y.L. ([yyl@channing.harvard.edu](mailto:yyl@channing.harvard.edu)) or C.P.K.  
23 ([ckelly2@bidmc.harvard.edu](mailto:ckelly2@bidmc.harvard.edu)).

24

25 **One Sentence Summary:** Incorporating both gut microbiome and host immune marker data into  
26 classification models can better distinguish CDI from other groups than can either type of data  
27 alone.

28

29

30

31

32

33

34

35

36

37 **Abstract:** Exposure to *Clostridioides difficile* can result in asymptomatic carriage or infection  
38 with symptoms ranging from mild diarrhea to fulminant pseudomembranous colitis. A reliable  
39 diagnostic approach for *C. difficile* infection (CDI) remains controversial. Accurate diagnosis is  
40 paramount not only for patient management but also for epidemiology and disease research.  
41 Here, we characterized gut microbial compositions and a broad panel of innate and adaptive  
42 immunological markers in 243 well-characterized human subjects, who were divided into four  
43 phenotype groups: CDI, Asymptomatic Carriage, Non-CDI Diarrhea, and Control. We found that  
44 CDI is associated with alteration of many different aspects of the gut microbiota, including  
45 overall microbial diversity and microbial association networks. We demonstrated that  
46 incorporating both gut microbiome and host immune marker data into classification models can  
47 better distinguish CDI from other groups than can either type of data alone. Our classification  
48 models display robust diagnostic performance to differentiate CDI from Asymptomatic carriage  
49 (AUC~0.916), Non-CDI Diarrhea (AUC~0.917), or Non-CDI that combines all other three  
50 groups (AUC~0.929). Finally, we performed symbolic classification using selected features to  
51 derive simple mathematic formulas for highly accurate CDI diagnosis. Overall, this study  
52 provides evidence supporting important roles of gut microbiota and host immune markers in CDI  
53 diagnosis, which may also inform the design of future therapeutic strategies.

54  
55  
56  
57  
58  
59  
60  
61  
62  
63  
64  
65  
66  
67  
68  
69  
70  
71  
72

## 73 INTRODUCTION

74 *Clostridioides difficile* infection (CDI) is the most common cause of healthcare-associated  
75 infection and an important cause of morbidity and mortality among hospitalized patients<sup>1-3</sup>.  
76 Current treatment strategies for CDI, including vancomycin, metronidazole and fidaxomicin,  
77 have inconsistent cure rates and treatment failure or CDI recurrence may occur in approximately  
78 one third of cases<sup>4,5</sup>. Antibiotic exposure is considered the most important factor predisposing  
79 patients to CDI<sup>6,7</sup>. In fact, treatments with antibiotics have a tremendous impact on the  
80 composition and functionality of the gut microbiota, and accordingly are associated with reduced  
81 colonization resistance against pathogens such as *C. difficile*<sup>8-10</sup>. A distinct microbial community  
82 structure has been reported to be associated with CDI in human cohorts and animal models<sup>11,12</sup>.  
83 Characterization of the microbial features in individuals with different *C. difficile*  
84 infection/colonization status is an essential step in understanding the role of the gut microbiome  
85 in the development of CDI.

86 The pathophysiology of CDI is mainly associated with the production of two exotoxins,  
87 toxin A (TcdA) and toxin B (TcdB)<sup>13</sup>. TcdA and TcdB act on intestinal epithelial cells, inducing  
88 pro-inflammatory cytokines, loss of tight junctions, cell detachment and an impaired mucosal  
89 barrier<sup>14-16</sup>. The innate and adaptive immune responses to CDI play crucial roles in disease onset,  
90 expression, severity, progression, and overall prognosis<sup>17,18</sup>. The innate immune defense  
91 mechanisms against *C. difficile* and its toxins include the commensal intestinal flora, mucosal  
92 barrier, intestinal epithelial cells, and mucosal immune system<sup>19,20</sup>. TcdA and TcdB have  
93 multiple effects on the innate immune system, including inducing expression of numerous pro-  
94 inflammatory mediators (e.g., cytokines, chemokines and neuroimmune peptides) and the  
95 recruitment and activation of a variety of innate immune cells<sup>21,22</sup>. Adaptive immunity is also  
96 sufficient to provide some protection from CDI, likely via antibody-mediated neutralization of  
97 TcdA and TcdB<sup>23-26</sup>. These immune markers also have the potential to act as clinically useful  
98 diagnostic markers of CDI.

99 Exposure to toxinogenic *C. difficile* can lead to a range of clinical outcomes ranging from  
100 asymptomatic colonization to mild diarrhea and more severe disease syndromes such as  
101 pseudomembranous colitis, toxic megacolon, bowel perforation, sepsis, and death<sup>27,28</sup>.  
102 Asymptomatic *C. difficile* carriage is characterized by *C. difficile* colonization in the absence of  
103 symptoms of infection. Previous studies suggest that *C. difficile* asymptomatic carriers have the  
104 potential to contribute to *C. difficile* transmission and hospital-onset CDI in inpatient facilities, as  
105 carriers can shed spores into the hospital environment<sup>29,30</sup>.

106 The diagnosis of CDI is based on clinical signs and symptoms in combination with  
107 laboratory testing. Several diagnostic laboratory tests are available including enzyme  
108 immunoassays (EIA) for TcdA and TcdB, nucleic acid amplification tests (NAAT), selective  
109 toxinogenic culture, cell cytotoxicity neutralization assay, and glutamate dehydrogenase EIA<sup>31-33</sup>.  
110 However, currently available approaches do not accurately differentiate CDI from diarrhea with  
111 another cause in a patient colonized with toxinogenic *C. difficile*. Over-diagnosis of disease  
112 could result in overtreatment of CDI, delayed recognition of other causes of illness, and  
113 unnecessary antibiotic exposures<sup>34</sup>.

114 Machine learning has a great impact in many areas of medical research, as it offers a  
115 principled approach for developing sophisticated, automatic, and objective algorithms for  
116 analysis of complex data. Indeed, previous studies indicate that supervised learning can be  
117 successfully employed for clinical disease assessment for diverse disorders including Parkinson's  
118 disease<sup>35</sup>, diabetes<sup>36</sup>, inflammatory bowel disease<sup>37</sup> and glaucoma<sup>38</sup>. In our previous work, we  
119 found that specific immune markers, particularly G-CSF, can be used to distinguish adults with  
120 CDI from other groups including asymptomatic carriers and NAAT-negative patients with and  
121 without diarrhea<sup>39</sup>. Here, we integrate the host immune marker data and newly obtained gut  
122 microbiome data from subjects of the same cohort to build classification models to optimally  
123 distinguish CDI from other groups. Our aim is to identify consistent biological signatures for  
124 highly accurate diagnosis of CDI.

125

## 126 RESULTS

### 127 Baseline demographic and clinical characteristics of participants

128 Our clinical cohort consists of 243 well-characterized recruited participants, who were divided  
129 into four groups (see Materials and Methods)<sup>39</sup>: (1) Control: subjects without diarrhea and with  
130 NAAT-negative stool (n=47); (2) Non-CDI Diarrhea: subjects with diarrhea but NAAT-negative  
131 stool (n=44); (3) Asymptomatic Carriage: subjects without diarrhea but with NAAT-positive  
132 stool (n=40); (4) CDI: subjects with diarrhea and NAAT-positive stool (n=112). The first three  
133 groups can be combined as the Non-CDI group. The entire clinical cohort had a mean  $\pm$  SD age  
134 of  $63.66 \pm 14.85$  year and was 48.15% female. Demographic data of the cohort are summarized  
135 in Table 1. In total, 187 participants (76.95%) had both gut microbiome and immune marker data  
136 available (see Table S1).

137

### 138 Microbial community structure

139 To compare the overall microbial community structure of the four groups, we first calculated the  
140 alpha diversity (i.e., the within-sample taxonomic diversity) of each sample at the genus level  
141 using four different measures: *taxa richness* (the observed number of different taxa present in the  
142 sample), *Chao1* (abundance-based estimator of taxa richness), *Evenness* (the uniformity of the  
143 population size of each taxa present in the sample), and *Shannon diversity index* (estimator of  
144 taxa richness and evenness: more weight on richness). (See Materials and Methods for detailed  
145 definitions of those alpha diversity measures.) As shown in Fig.1, We found that richness indices  
146 (taxa richness and Chao1) did not differ significantly among these groups. The gut microbiota of  
147 Non-CDI Diarrhea subjects showed lower evenness than that of the Control group. Shannon  
148 diversity was significantly lower in the Non-CDI Diarrhea and CDI groups than in the Control  
149 group.

150 To determine whether the gut microbial compositions of participants are affected by *C.*  
151 *difficile* infection/colonization status, we performed Principal Coordinates Analysis (PCoA) at  
152 the genus level using Bray-Curtis dissimilarity (which is a beta diversity measure to quantify the  
153 between-sample compositional dissimilarity). We found no distinct clusters corresponding to the

154 four different phenotype groups, implying that the gut microbial compositions of participants  
155 from the four groups are not significantly different (Fig. 2A). Interestingly, by directly  
156 comparing the beta diversity of each group, we did find that the CDI group displays higher beta  
157 diversity than other groups (Fig. 2B), indicating that the microbial compositions of participants  
158 within the CDI group vary more prominently than other groups. Permutational multivariate  
159 analysis of variance (PERMANOVA) showed that the overall bacterial composition differed  
160 significantly among different groups based on the CDI status ( $P < 0.001$ ; Table S2), whereas  
161 other host factors such as age, sex, race and ethnicity had no significant effect on the microbiome  
162 composition.

163 To identify microbiome markers (i.e., certain taxa with very high discriminatory ability)  
164 to differentiate those different phenotype groups, we performed differential abundance analysis.  
165 In particular, we used ANCOM<sup>40</sup> (analysis of composition of microbiomes) with a Benjamini-  
166 Hochberg correction, and adjusted for age and sex. We found that the abundances of 15 genera  
167 were significantly different between CDI and Asymptomatic Carriage groups (Fig. 3A and Table  
168 S3). Among the 15 genera, 4 of them (*Veillonella*, *Enterobacter*, *Granulicatella* and *Dialister*) of  
169 these genera were enriched in the CDI group, while the other 11 genera (*Lactococcus*, *Dorea*,  
170 *Moryella*, [*Ruminococcus*] *gauvreauii* group, *Stenotrophomonas*, *Agathobacter*, *Blautia*,  
171 *Sellimonas*, *Eggerthella*, *Faecalitalea* and *Lachnospiraceae* UCG-008) were enriched in the  
172 Asymptomatic Carriage group. We also found 16 differentially abundant genera between the  
173 Non-CDI Diarrhea group and the CDI group (Fig. 3B and Table S4). Of these, 10 genera  
174 (*Clostridioides*, *Enterobacter*, *Epulopiscium*, *Escherichia-Shigella*, *Eisenbergiella*, *Dialister*,  
175 *Ruminiclostridium*, *Fusobacterium*, *Klebsiella* and *Veillonella*) were enriched in the CDI group,  
176 and the other 6 genera ([*Eubacterium*] *hallii* group, *Collinsella*, *Agathobacter*, *Dorea*,  
177 *Stenotrophomonas* and *Streptococcus*) were enriched in the Non-CDI Diarrhea group. ANCOM  
178 analysis also enabled us to identify 40 genera (including *Clostridioides* and *Veillonella*) that have  
179 significant differential abundances between the CDI group and the whole Non-CDI group (Fig.  
180 3C and Table S5). Note that a total of 6 differentially abundant genera were identified from all  
181 the three comparisons: CDI vs. Asymptomatic Carriage; CDI vs. Non-CDI Diarrhea; CDI vs.  
182 Non-CDI. Among them, *Veillonella*, *Enterobacter* and *Dialister* were enriched in the CDI group,  
183 while *Dorea*, *Stenotrophomonas* and *Agathobacter* were depleted in the CDI group.

184

### 185 **Microbial correlation networks**

186 To compare the microbial communities of the four groups at the network-level, we constructed  
187 the genus-level microbial correlation network for each group using SparCC<sup>41</sup> (sparse correlations  
188 for compositional data). We found that the microbial correlation network of the CDI group has  
189 quite different structure compared to other groups (Fig. 4). In order to quantify the difference of  
190 the network structure, we calculated the number of nodes, number of edges, average degree (the  
191 average number of connections per node), graph density (measure of how close the network is to  
192 a complete graph), clustering coefficient (measure of how complete the neighborhood of a node  
193 is) and modularity (measure of how well a network decomposes into modular communities)

194 (Table S6). In general, compared with the networks of other groups, the network of the CDI  
195 group has fewer nodes and edges, lower average degree, but higher modularity. These indicate  
196 that the overall microbial correlations in the CDI group are much weaker than those in other  
197 groups.

198 To analyze these patterns in more detail, we used NetShift<sup>42</sup> to identify potentially  
199 important “driver” taxa responsible for the change of microbial correlations. This analysis  
200 revealed 24 potential driver taxa linked with the change of microbial correlations between CDI  
201 and Asymptomatic Carriage groups (Fig. S1). The top driver taxa were *Alistipes*, *Clostridioides*,  
202 *Desulfovibrio*, *Eggerthella*, *Erysipelatoclostridium*, *Klebsiella*, *Odoribacter* *Proteus*,  
203 *[Ruminococcus]\_torques\_group*, *Streptococcus*, *Vagococcus* and *Veillonella*. We then identified  
204 24 genera as potential driver taxa underlying the change of microbial correlations between CDI  
205 and Non-CDI Diarrhea groups (Fig. S2). The top driver taxa were *Alistipes*, *Buttiauxella*,  
206 *Citrobacter*, *Clostridium\_sensu\_stricto\_13*, *Desulfovibrio*, *Klebsiella*, *Oscillibacter*,  
207 *Phascolarctobacterium*, *Streptococcus* and *Veillonella*. Finally, Netshift analysis revealed 38  
208 potential driver taxa underlying the change of microbial correlations between CDI and Non-CDI  
209 groups. The top driver taxa were *Bifidobacterium*, *Clostridioides*, *Klebsiella*, *Oscillibacter*,  
210 *Streptococcus* and *Veillonella* (Fig. S3). Together, these results suggested that certain bacterial  
211 taxa (e.g., *Clostridioides*, *Klebsiella*, *Streptococcus* and *Veillonella*) could play an important role  
212 in driving the changes of microbial correlations in subjects with different *C. difficile*  
213 infection/colonization status.

214

### 215 **Host immune markers and CDI**

216 To determine the systemic levels of proinflammatory cytokines in CDI, we measured the  
217 circulating levels of granulocyte-colony stimulating factor (G-CSF), interleukin-1 $\beta$  (IL-1 $\beta$ ), IL-2,  
218 IL-4, IL-6, IL-8, IL-10, IL-13, IL-15, monocyte chemoattractant protein-1 (MCP-1), vascular  
219 endothelial growth factor-A (VEGF-A), and tumor necrosis factor-alpha (TNF- $\alpha$ ) as previously  
220 reported<sup>39</sup>. Serum concentrations of immunoglobulin A (IgA), IgG, and IgM antibodies against  
221 *C. difficile* toxin A and toxin B were measured by semi-quantitative enzyme-linked  
222 immunosorbent assay (ELISA). We previously demonstrated specific markers of these innate  
223 and adaptive immunity that can distinguish CDI from each of the other three groups<sup>39</sup>. In the  
224 current study, we are particularly interested in comparing the CDI group and the combined Non-  
225 CDI group. Based on the Mann-Whitney U test, we identified in total 11 immune markers that  
226 displayed significantly different concentrations in these two groups, including G-CSF, IL-4, IL-  
227 6, IL-8, IL-10, IL-15, TNF- $\alpha$ , MCP1, IgA anti-toxin A and B, and IgG anti-toxin A in blood  
228 (Table S7). All of these immune markers had higher concentrations in the CDI group than in the  
229 Non-CDI group. Host immune marker variations between samples were evaluated using the  
230 Principal Component Analysis (PCA) (Fig. 2C). PCA plot showed no clear clustering of those  
231 subjects based on immune marker concentrations. However, boxplot of Euclidean distance of  
232 immune marker profiles from CDI patients showed higher within-group variation than that in all  
233 the other three groups (Fig. 2D). PERMANOVA analysis indicated that the immune homeostasis



234 was significantly different among different groups based on the CDI status ( $P = 0.016$ ; Table  
235 S2). But age, gender, race and ethnicity did not have significant effects on the host immune  
236 marker levels.

237

### 238 **Interplay between gut microbiome and host immune markers**

239 To reveal the interplay between the gut microbiome and the host immune system, we calculated  
240 the correlations between microbial compositions (at the genus level) and the circulating levels of  
241 host immune markers for each of the four groups (Spearman correlation with Benjamini-  
242 Hochberg correction). The results are shown in Fig. 5 and Fig. S4. For the Control group, the  
243 most significant associations were identified as *Chiristensenellaceae R-7 group* negatively  
244 associated with  $\text{TNF}\alpha$ , *Bifidobacterium* positively associated with VEGFA and IL-13, *Rothia*  
245 positively associated with IL-15, and *Veillonella* positively related with IL-4 (Fig.5A and Fig.  
246 S4). For the Non-CDI Diarrhea group, *Ruminococcaceae UCG-011* was negatively correlated  
247 with IL-8 and IL-6, *Defluviitaleaceae UCG-011* was positively correlated with IL-1b, and  
248 *Blautia* was negatively correlated with MCP1 levels (Fig. 5B). For the Asymptomatic Carriage  
249 group, we found that *Lactobacillus* was negatively associated with VEGFA, *Akkermansia* was  
250 positively associated with IL-6, and *Enterococcus* was positively related to  $\text{TNF}\alpha$  (Fig. 5C). For  
251 the CDI group, negative associations involved *Akkermansia* and IL-10, *Lactococcus* and G-CSF,  
252 while positive associations involved *Lactobacillus* and IgG and IgA anti-toxin B (Fig. 5D).  
253 Interestingly, none of these most significant associations was universally present across different  
254 groups. This indicated that the interactions between gut microbiota and host immunological  
255 markers can be very sensitive to the status of *C. difficile* colonization and infection. More  
256 importantly, this result implies that the integration of gut microbiota and host immune markers  
257 might be quite useful for highly accurate diagnosis of CDI.

258

### 259 **Diagnostic accuracy for CDI classification based on host immune markers and gut 260 microbiota**

261 To determine whether host immune markers or gut microbiota could serve as biomarkers to  
262 classify subjects into different groups, we constructed a multi-class classifier based on random  
263 forests (RF). One of the most popular performance metrics of a classifier is the Area Under the  
264 receiver operating characteristic Curve (AUC). The performance of a multi-class classifier is  
265 measured by both micro-average and macro-average AUCs. (For micro-average AUC, we  
266 calculated the AUC from the individual true positive rates and false positive rates of the multi-  
267 class model. For the macro-average AUC, we calculated the AUC independently for each class  
268 and then took the average.) We considered three different feature types: (1) host immune maker  
269 concentrations alone; (2) gut microbial compositions alone; and (3) the integration of (1) and (2)  
270 in our classification analysis. To eliminate confounding effects, we excluded the genus  
271 *Clostridioides* from our classification analysis. The immune marker-based classifier achieved  
272 macro-average AUC  $\sim 0.827$  and micro-average AUC  $\sim 0.828$  (Fig. S5A), which are quite  
273 comparable to the performance of microbiota-based classifier (Fig. S5B). Interestingly,

274 integrating immune marker with gut microbiota showed much better classification performance  
275 (macro-average AUC  $\sim$  0.926 and micro-average AUC  $\sim$  0.869) (Fig. S5C).

276 We further performed binary classifications to distinguish CDI subjects from  
277 Asymptomatic Carriage, Non-CDI Diarrhea, and Non-CDI subjects, using different feature types  
278 (Fig. 6). The goal of this analysis was to assess whether any single taxon or immune marker  
279 could reliably differentiate CDI status. The importance of each feature was quantified by the  
280 Mean Decrease in Accuracy (MDA) of the classifier due to the exclusion (or permutation) of this  
281 feature. The more the accuracy of the classifier decreases due to the exclusion (or permutation)  
282 of a single feature, the more important that feature is deemed for classification of the data.

283 In the classification of CDI vs. Asymptomatic Carriage, we found that G-CSF and  
284 *Moryella* were the most important immune and microbial features, respectively (Fig. S6:A-B).  
285 But the classification based on G-CSF (or *Moryella*) alone did not yield very high performance:  
286 mean AUC  $\sim$  0.817 (or 0.701), respectively (Fig. 6:A1-A2). When we used all the immune  
287 markers (or all the genera) as features, we achieved mean AUC  $\sim$  0.867 (or 0.805), respectively  
288 (Fig. 6:A3-A4). Interestingly, when we integrated all the host immune markers and gut microbial  
289 composition data together, we achieved a much higher performance with mean AUC  $\sim$  0.900  
290 (Fig. 6:A5). In order to select a subset of features that is as discriminatory as the whole set of  
291 features, we followed the “1-SE” rule (i.e., one chooses the model with fewest features such that  
292 its classification performance is less than one standard error away from that of the model with all  
293 the features), and selected the following 4 features: 2 bacterial genera (*Moryella* and *Veillonella*)  
294 and 2 immune markers (G-CSF and IL-6) in classifying CDI and Asymptomatic Carriage groups  
295 (Fig. S6:G-J). The RF classifier with those selected features displayed an outstanding  
296 classification performance, with mean AUC  $\sim$  0.916 (Fig. 6:A6). Note that a significant negative  
297 correlation between *Moryella* and G-CSF was found in the Asymptomatic Carriage group (Fig.  
298 5C), which might contribute to the outstanding performance of the RF classifier with *Moryella*  
299 and G-CSF as selected features.

300 In the classification of CDI vs. Non-CDI Diarrhea groups, we found that G-CSF and  
301 *[Eubacterium]\_hallii\_group* are the top immune and microbial features, respectively (Fig. S6:C-  
302 D). But the classification based on G-CSF (or *[Eubacterium]\_hallii\_group*) alone did not  
303 perform very well: mean AUC  $\sim$  0.747 (or  $\sim$  0.630), respectively (Fig. 6:B1-B2). When we used  
304 all the immune marker (or all the microbial genera) as features, we achieved mean AUC  $\sim$  0.851  
305 (or  $\sim$  0.884), respectively (Fig. 6:B3-B4). By integrating all features from both host immune  
306 marker and gut microbial genera, we further improved the classification performance to mean  
307 AUC  $\sim$  0.918 (Fig. 6:B5). Following the “1-SE” rule, we selected the following 5 features: 3  
308 genera: *Enterococcus*, *Epulopiscium* and *[Eubacterium]\_hallii\_group*; and 2 immune markers:  
309 G-CSF and IgA anti-toxin A (Fig. S6:H-K). The RF classifier with those selected features  
310 achieved mean AUC  $\sim$  0.917 (Fig. 6:B6), which is quite comparable to that of using all the  
311 features. Note that *Enterococcus* was found to be significantly associated with G-CSF in the  
312 Non-CDI Diarrhea group (Fig. 5B). This might partially explain the outstanding performance of  
313 the RF classifier with *Enterococcus* and G-CSF as selected features.



314 In the classification of CDI vs. Non-CDI groups, we found that G-CSF and *Curvibacter*  
 315 are the top immune and microbial features, respectively (Fig. S6:E-F). Classification based on G-  
 316 CSF (or *Curvibacter*) alone achieved mean AUC  $\sim 0.802$  (or  $\sim 0.683$ ), respectively (Fig. 6:C1-  
 317 C2). When we used all the immune marker (or all the microbial genera) as features, we achieved  
 318 mean AUC  $\sim 0.878$  (or  $\sim 0.903$ ), respectively (Fig. 6:C3-C4). Integrating all features from both  
 319 host immune marker and gut microbial genera, we further improved the classification  
 320 performance to mean AUC  $\sim 0.941$  (Fig. 6:C5). Following the “1-SE” rule, we selected the  
 321 following 10 features: 6 genera: *Stenotrophomonas*, *Curvibacter*, *Enterobacter*, *Anaerobacillus*,  
 322 *Fusobacterium* and *Veillonella*; and 4 immune markers: G-CSF, IL-6, TNF- $\alpha$  and IgA anti-toxin  
 323 B (Fig. S6:I-L). Classification with those well selected features achieved mean AUC  $\sim 0.929$   
 324 (Fig. 6:C6).

325

### 326 Using symbolic classification to derive diagnostic scores.

327 The outstanding classification results based on well-selected features prompt us to derive simple  
 328 mathematical models for CDI diagnosis. To achieve that, we leveraged symbolic classification  
 329 (SC)<sup>43,44</sup>, a genetic programming technique that automatically searches the space of  
 330 mathematical expressions to find the model that best fits a given dataset. The fitness function in  
 331 SC is a maximization function, and the number of generations is chosen based on the saturation  
 332 of the fitness score (Fig. S7). Using the same set of selected features and trained with the entire  
 333 dataset, the SC model outperformed logistic regression (LR) in differentiating CDI from  
 334 Asymptomatic Carriage (or Non-CDI Diarrhea, or Non-CDI), based on various performance  
 335 metrics: Accuracy, Precision, Recall and F1-score (see Table 2).

336 Indeed, as shown in Table 2, we derived a simple SC model with selected features,  
 337 reaching a very high accuracy (0.896) in distinguishing CDI subjects from Asymptomatic  
 338 Carriage. Basically, for each subject  $i$ , we calculate the diagnostic score  $f(i)$  that will be used  
 339 for CDI diagnosis: the class of subject  $i$  is CDI if  $f(i) > 0$ ; Asymptomatic Carriage, if  $f(i) \leq 0$ .  
 340 Here,

$$341 \quad f(i) = x_{\text{GCSF}} * x_{\text{Veillonella}} (x_{\text{GCSF}}^3 - 0.2 * x_{\text{Moryella}} + 0.4) + 1.1 * x_{\text{GCSF}} - 0.1 * x_{\text{IL6}} -$$

$$342 \quad 18.25, \tag{1}$$

343 with  $x_a$  representing the abundance or concentration of feature- $a$  in subject- $i$ . Similarly, we  
 344 derived a SC model with accuracy of 0.900 in distinguishing CDI (if  $f(i) > 0$ ) from Non-CDI  
 345 Diarrhea (if  $f(i) \leq 0$ ) with the diagnostic score

$$346 \quad f(i) = x_{\text{Enterococcus}} * x_{\text{IgA\_toxA}} (0.5 * x_{\text{Epulopiscium}} - 1) + x_{\text{[Eubacterium]_hallii\_group}} (0.02 *$$

$$347 \quad -x_{\text{GCSF}}) + x_{\text{IgA\_toxA}} \left( 1 - \frac{10}{x_{\text{GCSF}}} \right) - \frac{0.003}{x_{\text{Enterococcus}}}. \tag{2}$$

348 Finally, we derived a SC model with accuracy of 0.882 in distinguishing CDI (if  $f(i) > 0$ ) from  
 349 Non-CDI (if  $f(i) \leq 0$ ) with the diagnostic score

$$350 \quad f(i) = x_{\text{GCSF}} * x_{\text{IgA\_toxB}} (0.2 * x_{\text{Anaerobacillus}} * x_{\text{GCSF}} * x_{\text{Stenotrophomonas}} * x_{\text{TNF}\alpha} + 0.04 *$$

$$351 \quad x_{\text{Curvibacter}} * x_{\text{GCSF}} + 0.3 * x_{\text{Enterobacter}}^4 * x_{\text{GCSF}} * x_{\text{Veillonella}}) + x_{\text{Fusobacterium}} *$$

$$x_{\text{GCSF}}(0.5 * x_{\text{Curvibacter}} + x_{\text{GCSF}} * x_{\text{Stenotrophomonas}}) + x_{\text{Curvibacter}}(0.1 * x_{\text{IL6}} - x_{\text{Anaerobacillus}}) + x_{\text{Stenotrophomonas}}(x_{\text{Stenotrophomonas}} - 2). \quad (3)$$

To ensure the SC models learned from the entire dataset are not overfitting, we performed cross-validation by randomly splitting the dataset to form a training set (80% of the data) and a held-out test set (20% of the data) in 10 different ways. Each time, for each classification task, we learned the SC model from the training dataset and evaluated it on the test dataset. Due to the different training sets, SC will derive different mathematical formulas (i.e., diagnostic scores). However, those SC models learned from different training datasets demonstrated quite robust performance in terms of Accuracy, Precision, Recall and F1-score (see Table S8). More importantly, even trained with less data, the SC models still outperformed LR models learned from the entire dataset.

These SC models consisted of explicit mathematical equations, which are more transparent than black-box classifiers such as RF. At the same time, the SC models are also more accurate than traditional classifiers (such as LR). The transparency and high accuracy highlight the importance of SC models in the clinical diagnosis of CDI.

## DISCUSSION

Current methods for CDI diagnosis are unable to combine high sensitivity and high clinical specificity, which can result in either underdiagnosis or overdiagnosis of CDI<sup>45</sup>. A more accurate diagnostic approach for CDI could optimize therapeutic decision-making and reduce transmission. Here, we employed 16S rRNA gene sequencing to profile the gut microbial compositions and combined the gut microbiome data with data from a broad panel of innate and adaptive host immune response markers to investigate the potential roles of these markers in the diagnosis of CDI. We demonstrated that the combination of host immune markers and gut microbial data can provide a potential route to optimize CDI diagnosis. Importantly, this work derived specific diagnostic models (in terms of mathematic equations) that yielded robust accuracy in differentiating CDI subjects from Asymptomatic Carriage, Non-CDI Diarrhea and Non-CDI groups.

Taxonomic diversity is a fundamental property of ecological systems. It is generally believed to be an important determinant of the structure and functioning of ecological communities<sup>46,47</sup>. Diversity indices have been routinely calculated in the study of human microbiome<sup>48</sup>. Consistent with previous studies<sup>49-52</sup>, we found that the gut microbiomes of CDI patients were characterized by lower Shannon diversity than that of the Control group. Interestingly, we observed an increased variation of both immune markers and gut microbial compositions in the CDI group with respect to other studied groups. This suggests that CDI is characterized by a significantly less stable microbiome and immune homeostasis. Our findings are in line with the Anna Karenina principle, which suggests that CDI linked changes in the microbiome and immune homeostasis are likely stochastic, leading to community instability<sup>53-55</sup>.

We were able to identify several candidate driver taxa (e.g., *Desulfovibrio*, *Klebsiella*, *Streptococcus* and *Veillonella*) that played a key role in driving the changes of microbial

392 correlation networks between CDI and Asymptomatic Carriage (or Non-CDI Diarrhea, Non-  
393 CDI) groups. Among those driver taxa, *Desulfovibrio* has previously been shown to have a  
394 pathogenic role in ulcerative colitis due to its ability to generate sulfides<sup>56</sup>. *Streptococcus* has  
395 previously been shown to produce lactate thus impacting *C. difficile* TcdA production and *tcdA*  
396 expression to alleviate CDI<sup>57</sup>. *Klebsiella* is a Gram-negative bacterium that cause different types  
397 of healthcare-associated infections including pneumonia, bloodstream infections, and  
398 meningitis<sup>58</sup>. *Klebsiella* bacteria have been increasingly shown to develop antimicrobial  
399 resistance, most recently to the class of antibiotics known as carbapenems<sup>59,60</sup>. It is thus possible  
400 that the CDI pathogenesis is further enforced by the enrichment of antagonistic bacteria present  
401 in the gut microbiome of CDI subjects. In addition, our analysis demonstrated that the  
402 associations between host immunological markers and gut microbial compositions in the CDI  
403 group were dramatically different from those in other groups. However, further investigations are  
404 needed to determine whether these alterations are integral to the CDI pathogenesis.

405 The diagnosis of CDI remains challenging, especially the ability to distinguish CDI and  
406 *C. difficile* colonization<sup>61-63</sup>. To address this issue, we developed classification models aimed at  
407 differentiating CDI status based on host immune markers and gut microbiome data. We excluded  
408 the genus *Clostridioides* in further classification analysis to eliminate confounding effects.  
409 Evaluating the classification performance of host immune markers or/and microbiome data in  
410 multi-class models, it appears that a combination of host immune markers and gut microbiome  
411 data can further improve the accuracy of classification. More specifically, we were able to  
412 identify specific immune and microbial features that could accurately distinguish CDI subjects  
413 from Asymptomatic Carriage, Non-CDI Diarrhea, and Non-CDI subjects. In addition, most of  
414 the selected features identified by feature selection were also differentially abundant genera and  
415 differentially expressed immune markers.

416 From the classification of CDI and Asymptomatic Carriage, we were able to select a few  
417 features with outstanding discriminability, including *Veillonella* and *Moryella*. Interestingly, a  
418 positive relationship between *Veillonella* and CDI has been identified in recent studies<sup>64-67</sup>. An  
419 important role for *Veillonella* in CDI is supported by the fact that *Veillonella* species were  
420 associated with low coprostanol levels that correlated strongly with CDI<sup>64</sup>. A similar negative  
421 relationship between *Moryella* species and CDI has previously been observed<sup>68</sup>. *Enterococcus*, a  
422 feature selected from the classification of CDI vs. Non-CDI Diarrhea, has been reported to be  
423 associated with CDI due to vancomycin resistance<sup>69</sup>. Consistent with the findings from previous  
424 reports<sup>70,71</sup>, *Epulopiscium* was significantly enriched in the CDI group and played an important  
425 role in differentiating this comparison. Among those features selected from the classification of  
426 CDI and Non-CDI groups, *Enterobacter* and *Fusobacterium* have been considered as  
427 opportunistic pathogens involved in multiple diseases<sup>72,73</sup>.

428 Machine learning method has the potential to identify biomarkers and aid in the diagnosis  
429 of many diseases. However, the learnt relationships between predictors and outcome are  
430 typically non-transparent, especially non-linear methods (i.e., decision tree learning). Previous  
431 study has shown that an interpretable trees framework can extract, measure, prune, select, and

432 summarize rules from a tree ensemble, and calculates frequent variable interactions<sup>74</sup>. However,  
433 these rules from tree ensembles are still too complicated to be clinically meaningful. Classical  
434 logistic regression, is one of the most common machine learning models in medicine<sup>75</sup>. The main  
435 drawback of LR is its failure to solve non-linear problems and it underperforms where there are  
436 multiple or non-linear decision boundaries<sup>76</sup>. Furthermore, the log odds scale in LR is hard to  
437 interpret<sup>77</sup>. Symbolic classification based on genetic programming is an automated technique to  
438 derive formulas from features for classification purpose<sup>78</sup>. Using the selected integrated features  
439 from the random forests model, we demonstrated that the mathematical formulas automatically  
440 derived from symbolic classification have robust diagnostic accuracy to differentiate CDI  
441 patients from Asymptomatic Carriage (or Non-CDI Diarrhea, and Non-CDI groups).  
442 Specifically, symbolic classification provides explicit mathematic formulas as its output, which  
443 significantly improves the transparency of the learned relationship between predictors and  
444 outcomes. These results hold translational promise in clinical diagnosis of CDI. Further external  
445 validation of the derived formulas will require a different cohort with the same inclusion criteria  
446 as ours. This is beyond the scope of the current work.

447 We previously demonstrated the potential clinical utility of a specific immunological  
448 biomarker (G-CSF) for CDI diagnosis<sup>39</sup>. This study leverages the newly obtained gut  
449 microbiome data from the same unique and well-characterized study cohort, allowing us to study  
450 integrated host immune marker and gut microbiome signatures. The fundamental differences  
451 between this study and our previous one are the clinical utilization of integrated immune and  
452 microbiome signatures to distinguish CDI patients from Asymptomatic Carriage, Non-CDI  
453 Diarrhea, and Non-CDI groups, and to derive diagnostic scores for CDI diagnosis. We believe  
454 that this study sets the stage to explore the potential role of an immune and microbiome-based  
455 test for CDI diagnosis. Of course, observed associations and selected features do not offer any  
456 causal relationships. Prospective studies are needed to validate the mechanism underlying the  
457 relationship between these selected features/biomarkers and the CDI infection/colonization  
458 status. The 16S rRNA sequencing may not have captured additional insights associated with the  
459 disease status available at the species or strain level. Further studies are needed to validate the  
460 clinical utility of the proposed biomarkers by metagenomics sequencing as well as  
461 metatranscriptomics, metaproteomics and metabolomics.

462 In summary, leveraging a well-characterized clinical cohort, we provided strong evidence  
463 that integrating gut microbiome and host immune signatures can significantly improve the CDI  
464 diagnosis. In particular, these results demonstrate that knowledge of gut microbial compositions  
465 in combination with host immune markers is beneficial in generating clinically relevant machine  
466 learning models for disease diagnosis. Indeed, the machine learning models show high diagnostic  
467 accuracy in differentiating true CDI from asymptomatic carriage of *C. difficile* and from non-*C.*  
468 *difficile* diarrhea, which are areas where current laboratory testing for CDI lacks adequate  
469 clinical specificity.

470  
471

## 472 **MATERIALS AND METHODS**

### 473 **Study cohort**

474 The background and design of this cohort has been described in details previously<sup>62</sup>. Concisely,  
475 we have four groups associated with different *C. difficile* infection/colonization statuses: (1)  
476 Control: subjects without diarrhea who had screened as eligible for the asymptomatic carriage  
477 group (see below) but were NAAT-negative on research stool testing; (2) Non-CDI Diarrhea:  
478 subjects with diarrhea but NAAT-negative stool on clinical testing; (3) Asymptomatic Carriage:  
479 subjects were admitted for at least 72 hours, had received at least one dose of an antibiotic within  
480 the past 7 days, did not have diarrhea in the 48 hours prior to stool sample collection, had  
481 positive NAAT results on research stool testing and were not treated for CDI; (4) CDI: inpatients  
482 with positive clinical stool NAAT result, diarrhea, and a decision to treat for CDI. All subjects  
483 were adults (age  $\geq$  18 years old). Clinical serum samples were collected as discards within 24  
484 hours of stool sample collection. In our previous study<sup>39</sup>, the four groups were named as (1) “no  
485 Diarrhea NAAT-Negative” = Control; (2) diarrhea NAAT-negative = Non-CDI Diarrhea; (3)  
486 Carrier-NAAT = Asymptomatic Carriage and (4) CDI-NAAT = CDI. In this work, for simplicity  
487 we used the simpler and more clearly descriptive titles.

488

### 489 **Serum immune marker measurement**

490 The measurement of host serum cytokines concentrations of IL-2, IL-4, IL-6, IL-8, IL-10, IL-13,  
491 IL-15, IL-1 $\beta$ , G-CSF, IL-1 $\beta$ , MCP-1, VEGF-A, and TNF- $\alpha$  was performed using a Milliplex  
492 magnetic bead kit and Luminex analyzer (MAGPIX) (Millipore Sigma, Inc., Burlington, MA) as  
493 per the manufacturer’s instructions. Purified toxin A and B were separately prepared from *C.*  
494 *difficile* strain VPI 10463 (American Type Culture Collection 43255-FZ, Manassas, VA). Serum  
495 antibody (IgA, IgG, and IgM) levels against *C. difficile* toxins A and B were measured by semi-  
496 quantitative enzyme-linked immunosorbent assay (ELISA). All the experimental details have  
497 been reported previously<sup>39,62</sup>.

498

### 499 **Fecal DNA extraction and bacterial 16S rRNA sequencing data analysis**

500 Stool DNA was extracted using the DNeasy PowerSoil Pro Kit (Qiagen, cat# 12888-100) in a  
501 QiaCube automated DNA extraction system (Qiagen) according to instructions. Briefly, 250mg  
502 stool was transferred into a PowerBead Pro Tube provided with the kit and 200  $\mu$ g RNaseA and  
503 800  $\mu$ l of CD1 solution were added. Tubes were vortexed briefly, transferred into an adapter, and  
504 then vortexed at maximum speed for 10 min. Tubes were centrifuged at 15,000 x g for 1 min and  
505 about 500–600  $\mu$ l supernatant was used for DNA extraction according to instructions. DNA were  
506 eluted in 70  $\mu$ l elution solution C6 and stored at -80°C until use. 16S rRNA microbiome  
507 characterization was performed by sequencing the V4 region of the 16S rRNA gene using the  
508 Illumina MiSeq.<sup>79</sup> Each sample was amplified using a barcoded primer, which yielded a unique  
509 sequence identifier tagged onto each individual sample library. Illumina-based sequencing  
510 yielded greater than 15,000 reads per sample. CLC Genomics Workbench version 12 (Qiagen)  
511 was used for OTU clustering and generation of abundance tables. Analyses were performed



512 using the tutorial “OTU Clustering Step by Step” updated September 2, 2019 and available on  
513 the Qiagen website:

514 [https://resources.qiagenbioinformatics.com/tutorials/OTU\\_Clustering\\_Steps.pdf](https://resources.qiagenbioinformatics.com/tutorials/OTU_Clustering_Steps.pdf)

515

### 516 **Microbial diversity and differential abundance analysis**

517 Both alpha and beta diversity measures were calculated at the genus level using the vegan:  
518 Community Ecology Package in R (<https://CRAN.R-project.org/package=vegan>). Measures of  
519 alpha diversity included: the richness  $S$  (the number of taxa present in the community/sample),  
520 Chao 1 index  $S_{chao1} = S + \frac{F_1(F_1-1)}{2(F_2+1)}$ , Shannon index  $H = -\sum_{i=1}^S p_i \log p_i$ , and evenness  $J =$   
521  $H/\log S$ . Here,  $F_1$  and  $F_2$  are the count of singletons and doubletons, respectively, and  $p_i$  is the  
522 relative abundance of taxon- $i$  in the community. For beta diversity, we used the Bray-Curtis  
523 dissimilarity measure, which was also used in the Principal Coordinates Analysis (PCoA). We  
524 applied principal component analysis (PCA) on the expression levels of all immune markers  
525 based on the Euclidean distance.

526 Difference in microbiome compositions and immune expression levels by CDI status  
527 (i.e., different groups) and other covariates (i.e., age, sex, race and ethnicity) were tested by the  
528 permutational multivariate analysis of variance (PERMANOVA) using the “adonis” function in  
529 the vegan R package. All PERMANOVA tests were performed with the default 999  
530 permutations based on the Bray-Curtis dissimilarity and Euclidean distance for microbial  
531 composition and immune marker data, respectively. Note that in the PERMANOVA tests, we  
532 only included subjects with known information of age, sex, race and ethnicity.

533 For differential abundance analysis, we used ANCOM<sup>40</sup> (analysis of composition of  
534 microbiomes), with a Benjamini–Hochberg correction at 5% level of significance, and adjusted  
535 for age and sex. The Mann–Whitney U test was used to compare the difference of immune  
536 marker levels between different groups.

537

### 538 **Microbial correlation network analysis**

539 The microbial correlation networks were constructed using SparCC<sup>41</sup> (sparse correlations for  
540 compositional data, <https://github.com/luispedro/sparcc>). Significant interactions were  
541 determined by the bootstrapped results ( $N = 100$ ) using the script PseudoPvals in SparCC.  
542 Significant correlations with absolute sparse correlations  $\geq 0.3$  were visualized using Gephi  
543 (<https://gephi.org/>). We also used the NetShift<sup>42</sup> (<https://web.rniapps.net/netshift>) to identify  
544 potential “driver” taxa underlying the differences of microbial correlation networks associated  
545 with CDI and Asymptomatic Carriage (or Non-CDI Diarrhea, and Non-CDI). The key driver  
546 taxa were identified based on the neighbor shift (NESH) score, Jaccard Index and delta  
547 betweenness ( $\Delta B$ )<sup>42</sup>.

548

### 549 **Microbiome-Immune marker association analysis**

550 Associations between the gut microbiota and host immune markers were quantified by Spearman  
551 correlation coefficients in combination with Benjamini-Hochberg FDR correction to account for

552 multiple hypothesis testing (significance threshold  $\alpha \leq 0.05$ ). All included genera were required  
553 to be detected in  $\geq 50\%$  of all samples in each group.

554

### 555 **Classification with Random Forests model**

556 To build a classification model capable of testing the overall contribution of immunological or  
557 microbial data in distinguishing the CDI status, we developed a multi-class random forests (RF)  
558 classifier. The data is split into a training set and a test set, with 70% of the data forming the  
559 training data and the remaining 30% forming the test set. The performance of the multi-class  
560 model was measured by micro-average and macro-average AUC. A macro-average score  
561 computed the metric independently for each group and then was averaged across all levels  
562 regardless of the number of samples in each group, whereas a micro-average will aggregate the  
563 contributions of all groups to compute the average metric.

564 To determine whether more specific host immune markers or gut microbial taxa could  
565 differentiate CDI subjects from Asymptomatic Carriage, Non-CDI Diarrhea and Non-CDI  
566 groups, we constructed the binary classifiers based on RF models with integrated immune  
567 markers and microbiome data. The performance of the classifiers were evaluated by a 5-fold  
568 cross validation. In order to reduce computation complexity and feature redundancy, a feature  
569 selection procedure was performed as follows. We first ranked all the features based on their  
570 mean decrease accuracy (MDA). Then we followed the “1-SE strategy” to select the minimum  
571 set of top features whose mean AUC is within one standard error of the mean AUC from the  
572 model with all of the features.

573

### 574 **Symbolic classification with genetic programming**

575 Genetic programming (GP) is a genetic algorithm that searches the space of mathematical  
576 equations without any constraints on their forms<sup>80</sup>. GP involves reproduction, random mutation,  
577 crossover, a fitness function, and multiple generations of evolution of a population of computer  
578 programs to resolve a given task. GP is commonly used to investigate a functional relationship  
579 (i.e., a mathematical formula) between features in data (symbolic regression: SR) or to group  
580 data into categories (symbolic classification: SC). We employed Karoo GP<sup>81</sup>, a genetic  
581 programming application suite written in Python that support both SR and SC analysis, to derive  
582 simple formulas for CDI diagnosis. We performed a random data-split to create a training set  
583 (80% of the data) and a held-out test set (20% of the data) for ten times, which were used to  
584 evaluate the SC performance. Due to the different training sets, SC will derive different  
585 formulas, but their classification performances (in terms of Accuracy, Precision, Recall, F1-  
586 score) are quite comparable (Table S8). The formulas shown in Table 2 were derived based on  
587 the whole dataset. The Karoo GP was used with the following settings: (1) the fitness function  
588 (Kernel) is c (representing “classification”); (2) the type of tree is r (ramped half/half); (3) the  
589 maximum tree depth for the initial population is 6; (4) the number of trees per generation is 100;  
590 (5) the maximum number of generations is 190 (based on the converging results shown in Fig.  
591 S7); (6) constants include 0.1, 0.2, 0.3, 0.4 and 0.5; and (7) all other parameters are set as default

592 values. The fitness function in SC is a maximization function, which will seek the highest fitness  
593 score among the trees in each generation. The sign of the final formula  $f(i)$  will be used for CDI  
594 diagnosis: the class of subject  $i$  is CDI if  $f(i) > 0$ ; or Asymptomatic Carriage (or Non-CDI  
595 Diarrhea, Non-CDI) if  $f(i) \leq 0$ .

596 To demonstrate the advantage of SC, for each classification task (i.e., CDI vs.  
597 Asymptomatic Carriage, CDI vs. Non-CDI Diarrhea, and CDI vs. Non-CDI), we also performed  
598 logistic regression (LR) using the same set of selected features as used in SC (Table 2). The LR  
599 models were constructed using the `glm()` function in R. The class of subject  $i$  is CDI if  
600  $p(i) \geq 0.5$ ; or Asymptomatic Carriage (or Non-CDI Diarrhea, Non-CDI) if  $p(i) < 0.5$ .

601  
602  
603  
604  
605  
606  
607  
608  
609  
610  
611  
612  
613  
614  
615  
616  
617  
618  
619  
620  
621  
622  
623  
624  
625  
626  
627

## 628 REFERENCES AND NOTES

- 629 1 Lessa, F. C. *et al.* Burden of Clostridium difficile infection in the United States. *N Engl J*  
630 *Med* **372**, 825-834, doi:10.1056/NEJMoa1408913 (2015).
- 631 2 Depestel, D. D. & Aronoff, D. M. Epidemiology of Clostridium difficile infection. *J*  
632 *Pharm Pract* **26**, 464-475, doi:10.1177/0897190013499521 (2013).
- 633 3 McDonald, L. C. *et al.* Clinical Practice Guidelines for Clostridium difficile Infection in  
634 Adults and Children: 2017 Update by the Infectious Diseases Society of America (IDSA)  
635 and Society for Healthcare Epidemiology of America (SHEA). *Clin Infect Dis* **66**, e1-  
636 e48, doi:10.1093/cid/cix1085 (2018).
- 637 4 Bagdasarian, N., Rao, K. & Malani, P. N. Diagnosis and treatment of Clostridium  
638 difficile in adults: a systematic review. *JAMA* **313**, 398-408,  
639 doi:10.1001/jama.2014.17103 (2015).
- 640 5 Rineh, A., Kelso, M. J., Vatansever, F., Tegos, G. P. & Hamblin, M. R. Clostridium  
641 difficile infection: molecular pathogenesis and novel therapeutics. *Expert Rev Anti Infect*  
642 *Ther* **12**, 131-150, doi:10.1586/14787210.2014.866515 (2014).
- 643 6 Stevens, V., Dumyati, G., Fine, L. S., Fisher, S. G. & van Wijngaarden, E. Cumulative  
644 antibiotic exposures over time and the risk of Clostridium difficile infection. *Clin Infect*  
645 *Dis* **53**, 42-48, doi:10.1093/cid/cir301 (2011).
- 646 7 Slimings, C. & Riley, T. V. Antibiotics and hospital-acquired Clostridium difficile  
647 infection: update of systematic review and meta-analysis. *J Antimicrob Chemother* **69**,  
648 881-891, doi:10.1093/jac/dkt477 (2014).
- 649 8 Lewis, B. B. *et al.* Loss of Microbiota-Mediated Colonization Resistance to Clostridium  
650 difficile Infection With Oral Vancomycin Compared With Metronidazole. *J Infect Dis*  
651 **212**, 1656-1665, doi:10.1093/infdis/jiv256 (2015).
- 652 9 Becattini, S., Taur, Y. & Pamer, E. G. Antibiotic-Induced Changes in the Intestinal  
653 Microbiota and Disease. *Trends Mol Med* **22**, 458-478,  
654 doi:10.1016/j.molmed.2016.04.003 (2016).
- 655 10 Buffie, C. G. *et al.* Profound alterations of intestinal microbiota following a single dose  
656 of clindamycin results in sustained susceptibility to Clostridium difficile-induced colitis.  
657 *Infect Immun* **80**, 62-73, doi:10.1128/IAI.05496-11 (2012).
- 658 11 Perez-Cobas, A. E. *et al.* Structural and functional changes in the gut microbiota  
659 associated to Clostridium difficile infection. *Front Microbiol* **5**, 335,  
660 doi:10.3389/fmicb.2014.00335 (2014).
- 661 12 Theriot, C. M. *et al.* Antibiotic-induced shifts in the mouse gut microbiome and  
662 metabolome increase susceptibility to Clostridium difficile infection. *Nat Commun* **5**,  
663 3114, doi:10.1038/ncomms4114 (2014).
- 664 13 Leffler, D. A. & Lamont, J. T. Clostridium difficile Infection. *N Engl J Med* **373**, 287-  
665 288, doi:10.1056/NEJMc1506004 (2015).
- 666 14 Genth, H., Dreger, S. C., Huelsenbeck, J. & Just, I. Clostridium difficile toxins: more  
667 than mere inhibitors of Rho proteins. *Int J Biochem Cell Biol* **40**, 592-597,  
668 doi:10.1016/j.biocel.2007.12.014 (2008).
- 669 15 Sun, X., He, X., Tzipori, S., Gerhard, R. & Feng, H. Essential role of the  
670 glucosyltransferase activity in Clostridium difficile toxin-induced secretion of TNF-alpha  
671 by macrophages. *Microb Pathog* **46**, 298-305, doi:10.1016/j.micpath.2009.03.002 (2009).

- 672 16 Riegler, M. *et al.* Clostridium difficile toxin B is more potent than toxin A in damaging  
673 human colonic epithelium in vitro. *J Clin Invest* **95**, 2004-2011, doi:10.1172/JCI117885  
674 (1995).
- 675 17 Sun, X. & Hirota, S. A. The roles of host and pathogen factors and the innate immune  
676 response in the pathogenesis of Clostridium difficile infection. *Mol Immunol* **63**, 193-202,  
677 doi:10.1016/j.molimm.2014.09.005 (2015).
- 678 18 Kelly, C. P. & Kyne, L. The host immune response to Clostridium difficile. *J Med*  
679 *Microbiol* **60**, 1070-1079, doi:10.1099/jmm.0.030015-0 (2011).
- 680 19 Bibbo, S. *et al.* Role of microbiota and innate immunity in recurrent Clostridium difficile  
681 infection. *J Immunol Res* **2014**, 462740, doi:10.1155/2014/462740 (2014).
- 682 20 Iacob, S., Iacob, D. G. & Luminos, L. M. Intestinal Microbiota as a Host Defense  
683 Mechanism to Infectious Threats. *Front Microbiol* **9**, 3328,  
684 doi:10.3389/fmicb.2018.03328 (2018).
- 685 21 Madan, R. & Petri, W. A., Jr. Immune responses to Clostridium difficile infection.  
686 *Trends Mol Med* **18**, 658-666, doi:10.1016/j.molmed.2012.09.005 (2012).
- 687 22 Sun, X., Savidge, T. & Feng, H. The enterotoxicity of Clostridium difficile toxins. *Toxins*  
688 (*Basel*) **2**, 1848-1880, doi:10.3390/toxins2071848 (2010).
- 689 23 Kyne, L., Warny, M., Qamar, A. & Kelly, C. P. Association between antibody response  
690 to toxin A and protection against recurrent Clostridium difficile diarrhoea. *Lancet* **357**,  
691 189-193, doi:10.1016/S0140-6736(00)03592-3 (2001).
- 692 24 Wilcox, M. H. *et al.* Bezlotoxumab for Prevention of Recurrent Clostridium difficile  
693 Infection. *N Engl J Med* **376**, 305-317, doi:10.1056/NEJMoa1602615 (2017).
- 694 25 Giannasca, P. J. *et al.* Serum antitoxin antibodies mediate systemic and mucosal  
695 protection from Clostridium difficile disease in hamsters. *Infect Immun* **67**, 527-538  
696 (1999).
- 697 26 Johnston, P. F., Gerding, D. N. & Knight, K. L. Protection from Clostridium difficile  
698 infection in CD4 T Cell- and polymeric immunoglobulin receptor-deficient mice. *Infect*  
699 *Immun* **82**, 522-531, doi:10.1128/IAI.01273-13 (2014).
- 700 27 Rupnik, M., Wilcox, M. H. & Gerding, D. N. Clostridium difficile infection: new  
701 developments in epidemiology and pathogenesis. *Nat Rev Microbiol* **7**, 526-536,  
702 doi:10.1038/nrmicro2164 (2009).
- 703 28 Schaffler, H. & Breitruck, A. Clostridium difficile - From Colonization to Infection.  
704 *Front Microbiol* **9**, 646, doi:10.3389/fmicb.2018.00646 (2018).
- 705 29 Blixt, T. *et al.* Asymptomatic Carriers Contribute to Nosocomial Clostridium difficile  
706 Infection: A Cohort Study of 4508 Patients. *Gastroenterology* **152**, 1031-1041 e1032,  
707 doi:10.1053/j.gastro.2016.12.035 (2017).
- 708 30 Guerrero, D. M. *et al.* Asymptomatic carriage of toxigenic Clostridium difficile by  
709 hospitalized patients. *J Hosp Infect* **85**, 155-158, doi:10.1016/j.jhin.2013.07.002 (2013).
- 710 31 Tenover, F. C., Baron, E. J., Peterson, L. R. & Persing, D. H. Laboratory diagnosis of  
711 Clostridium difficile infection can molecular amplification methods move us out of  
712 uncertainty? *J Mol Diagn* **13**, 573-582, doi:10.1016/j.jmoldx.2011.06.001 (2011).
- 713 32 Burnham, C. A. & Carroll, K. C. Diagnosis of Clostridium difficile infection: an ongoing  
714 conundrum for clinicians and for clinical laboratories. *Clin Microbiol Rev* **26**, 604-630,  
715 doi:10.1128/CMR.00016-13 (2013).



- 716 33 Musher, D. M. *et al.* Detection of *Clostridium difficile* toxin: comparison of enzyme  
717 immunoassay results with results obtained by cytotoxicity assay. *J Clin Microbiol* **45**,  
718 2737-2739, doi:10.1128/JCM.00686-07 (2007).
- 719 34 Kociolek, L. K. *et al.* Impact of a Healthcare Provider Educational Intervention on  
720 Frequency of *Clostridium difficile* Polymerase Chain Reaction Testing in Children: A  
721 Segmented Regression Analysis. *J Pediatric Infect Dis Soc* **6**, 142-148,  
722 doi:10.1093/jpids/piw027 (2017).
- 723 35 Abos, A. *et al.* Discriminating cognitive status in Parkinson's disease through functional  
724 connectomics and machine learning. *Sci Rep* **7**, 45347, doi:10.1038/srep45347 (2017).
- 725 36 Dagliati, A. *et al.* Machine Learning Methods to Predict Diabetes Complications. *J*  
726 *Diabetes Sci Technol* **12**, 295-302, doi:10.1177/1932296817706375 (2018).
- 727 37 Mossotto, E. *et al.* Classification of Paediatric Inflammatory Bowel Disease using  
728 Machine Learning. *Sci Rep* **7**, 2427, doi:10.1038/s41598-017-02606-2 (2017).
- 729 38 Kim, S. J., Cho, K. J. & Oh, S. Development of machine learning models for diagnosis of  
730 glaucoma. *PLoS One* **12**, e0177726, doi:10.1371/journal.pone.0177726 (2017).
- 731 39 Kelly, C. P. *et al.* Host Immune Markers Distinguish *Clostridioides difficile* Infection  
732 From Asymptomatic Carriage and Non-*C. difficile* Diarrhea. *Clin Infect Dis*,  
733 doi:10.1093/cid/ciz330 (2019).
- 734 40 Mandal, S. *et al.* Analysis of composition of microbiomes: a novel method for studying  
735 microbial composition. *Microb Ecol Health Dis* **26**, 27663, doi:10.3402/mehd.v26.27663  
736 (2015).
- 737 41 Friedman, J. & Alm, E. J. Inferring correlation networks from genomic survey data. *PLoS*  
738 *Comput Biol* **8**, e1002687, doi:10.1371/journal.pcbi.1002687 (2012).
- 739 42 Kuntal, B. K., Chandrakar, P., Sadhu, S. & Mande, S. S. 'NetShift': a methodology for  
740 understanding 'driver microbes' from healthy and disease microbiome datasets. *ISME J*  
741 **13**, 442-454, doi:10.1038/s41396-018-0291-x (2019).
- 742 43 Bannister, C. A., Halcox, J. P., Currie, C. J., Preece, A. & Spasic, I. A genetic  
743 programming approach to development of clinical prediction models: A case study in  
744 symptomatic cardiovascular disease. *PLoS One* **13**, e0202685,  
745 doi:10.1371/journal.pone.0202685 (2018).
- 746 44 Schmidt, M. & Lipson, H. Distilling free-form natural laws from experimental data.  
747 *Science* **324**, 81-85, doi:10.1126/science.1165893 (2009).
- 748 45 Gateau, C., Couturier, J., Coia, J. & Barbut, F. How to: diagnose infection caused by  
749 *Clostridium difficile*. *Clin Microbiol Infect* **24**, 463-468, doi:10.1016/j.cmi.2017.12.005  
750 (2018).
- 751 46 Loreau, M. *et al.* Biodiversity and ecosystem functioning: current knowledge and future  
752 challenges. *Science* **294**, 804-808, doi:10.1126/science.1064088 (2001).
- 753 47 Ives, A. R. & Carpenter, S. R. Stability and diversity of ecosystems. *Science* **317**, 58-62,  
754 doi:10.1126/science.1133258 (2007).
- 755 48 Ma, Z. S., Li, L. & Gotelli, N. J. Diversity-disease relationships and shared species  
756 analyses for human microbiome-associated diseases. *ISME J* **13**, 1911-1919,  
757 doi:10.1038/s41396-019-0395-y (2019).
- 758 49 Song, Y. *et al.* Microbiota dynamics in patients treated with fecal microbiota  
759 transplantation for recurrent *Clostridium difficile* infection. *PLoS One* **8**, e81330,  
760 doi:10.1371/journal.pone.0081330 (2013).

- 761 50 Milani, C. *et al.* Gut microbiota composition and *Clostridium difficile* infection in  
762 hospitalized elderly individuals: a metagenomic study. *Sci Rep* **6**, 25945,  
763 doi:10.1038/srep25945 (2016).
- 764 51 Jiang, Z. D. *et al.* Randomised clinical trial: faecal microbiota transplantation for  
765 recurrent *Clostridium difficile* infection - fresh, or frozen, or lyophilised microbiota from  
766 a small pool of healthy donors delivered by colonoscopy. *Aliment Pharmacol Ther* **45**,  
767 899-908, doi:10.1111/apt.13969 (2017).
- 768 52 Shankar, V. *et al.* Species and genus level resolution analysis of gut microbiota in  
769 *Clostridium difficile* patients following fecal microbiota transplantation. *Microbiome* **2**,  
770 13, doi:10.1186/2049-2618-2-13 (2014).
- 771 53 Zaneveld, J. R., McMinds, R. & Vega Thurber, R. Stress and stability: applying the Anna  
772 Karenina principle to animal microbiomes. *Nat Microbiol* **2**, 17121,  
773 doi:10.1038/nmicrobiol.2017.121 (2017).
- 774 54 Giongo, A. *et al.* Toward defining the autoimmune microbiome for type 1 diabetes. *ISME*  
775 *J* **5**, 82-91, doi:10.1038/ismej.2010.92 (2011).
- 776 55 Caussy, C. *et al.* A gut microbiome signature for cirrhosis due to nonalcoholic fatty liver  
777 disease. *Nat Commun* **10**, 1406, doi:10.1038/s41467-019-09455-9 (2019).
- 778 56 Rowan, F. *et al.* *Desulfovibrio* bacterial species are increased in ulcerative colitis. *Dis*  
779 *Colon Rectum* **53**, 1530-1536, doi:10.1007/DCR.0b013e3181f1e620 (2010).
- 780 57 Kolling, G. L. *et al.* Lactic acid production by *Streptococcus thermophilus* alters  
781 *Clostridium difficile* infection and in vitro Toxin A production. *Gut Microbes* **3**, 523-529,  
782 doi:10.4161/gmic.21757 (2012).
- 783 58 van de Beek, D. *et al.* Clinical features and prognostic factors in adults with bacterial  
784 meningitis. *N Engl J Med* **351**, 1849-1859, doi:10.1056/NEJMoa040845 (2004).
- 785 59 Arnold, R. S. *et al.* Emergence of *Klebsiella pneumoniae* carbapenemase-producing  
786 bacteria. *South Med J* **104**, 40-45, doi:10.1097/SMJ.0b013e3181fd7d5a (2011).
- 787 60 Navon-Venezia, S., Kondratyeva, K. & Carattoli, A. *Klebsiella pneumoniae*: a major  
788 worldwide source and shuttle for antibiotic resistance. *FEMS Microbiol Rev* **41**, 252-275,  
789 doi:10.1093/femsre/fux013 (2017).
- 790 61 Cohen, S. H. *et al.* Clinical practice guidelines for *Clostridium difficile* infection in  
791 adults: 2010 update by the society for healthcare epidemiology of America (SHEA) and  
792 the infectious diseases society of America (IDSA). *Infect Control Hosp Epidemiol* **31**,  
793 431-455, doi:10.1086/651706 (2010).
- 794 62 Pollock, N. R. *et al.* Comparison of *Clostridioides difficile* Stool Toxin Concentrations in  
795 Adults With Symptomatic Infection and Asymptomatic Carriage Using an Ultrasensitive  
796 Quantitative Immunoassay. *Clin Infect Dis* **68**, 78-86, doi:10.1093/cid/ciy415 (2019).
- 797 63 Crobach, M. J. T. *et al.* Understanding *Clostridium difficile* Colonization. *Clin Microbiol*  
798 *Rev* **31**, doi:10.1128/CMR.00021-17 (2018).
- 799 64 Antharam, V. C. *et al.* An Integrated Metabolomic and Microbiome Analysis Identified  
800 Specific Gut Microbiota Associated with Fecal Cholesterol and Coprostanol in  
801 *Clostridium difficile* Infection. *PLoS One* **11**, e0148824,  
802 doi:10.1371/journal.pone.0148824 (2016).
- 803 65 Khanna, S. *et al.* Gut microbiome predictors of treatment response and recurrence in  
804 primary *Clostridium difficile* infection. *Aliment Pharmacol Ther* **44**, 715-727,  
805 doi:10.1111/apt.13750 (2016).

- 806 66 Han, S. H., Yi, J., Kim, J. H., Lee, S. & Moon, H. W. Composition of gut microbiota in  
807 patients with toxigenic Clostridioides (Clostridium) difficile: Comparison between  
808 subgroups according to clinical criteria and toxin gene load. *PLoS One* **14**, e0212626,  
809 doi:10.1371/journal.pone.0212626 (2019).
- 810 67 Daquigan, N., Seekatz, A. M., Greathouse, K. L., Young, V. B. & White, J. R. High-  
811 resolution profiling of the gut microbiome reveals the extent of Clostridium difficile  
812 burden. *NPJ Biofilms Microbiomes* **3**, 35, doi:10.1038/s41522-017-0043-0 (2017).
- 813 68 Hudson, L. E., Anderson, S. E., Corbett, A. H. & Lamb, T. J. Gleaning Insights from  
814 Fecal Microbiota Transplantation and Probiotic Studies for the Rational Design of  
815 Combination Microbial Therapies. *Clin Microbiol Rev* **30**, 191-231,  
816 doi:10.1128/CMR.00049-16 (2017).
- 817 69 Fujitani, S., George, W. L., Morgan, M. A., Nichols, S. & Murthy, A. R. Implications for  
818 vancomycin-resistant Enterococcus colonization associated with Clostridium difficile  
819 infections. *Am J Infect Control* **39**, 188-193, doi:10.1016/j.ajic.2010.10.024 (2011).
- 820 70 Antharam, V. C. *et al.* Intestinal dysbiosis and depletion of butyrogenic bacteria in  
821 Clostridium difficile infection and nosocomial diarrhea. *J Clin Microbiol* **51**, 2884-2892,  
822 doi:10.1128/JCM.00845-13 (2013).
- 823 71 Sokol, H. *et al.* Specificities of the intestinal microbiota in patients with inflammatory  
824 bowel disease and Clostridium difficile infection. *Gut Microbes* **9**, 55-60,  
825 doi:10.1080/19490976.2017.1361092 (2018).
- 826 72 Mezzatesta, M. L., Gona, F. & Stefani, S. Enterobacter cloacae complex: clinical impact  
827 and emerging antibiotic resistance. *Future Microbiol* **7**, 887-902, doi:10.2217/fmb.12.61  
828 (2012).
- 829 73 Umana, A. *et al.* Utilizing Whole Fusobacterium Genomes To Identify, Correct, and  
830 Characterize Potential Virulence Protein Families. *J Bacteriol* **201**,  
831 doi:10.1128/JB.00273-19 (2019).
- 832 74 Deng, H. Interpreting tree ensembles with inTrees. *International Journal of Data Science  
833 and Analytics* **7**, 277-287, doi:10.1007/s41060-018-0144-8 (2019).
- 834 75 Dreiseitl, S. & Ohno-Machado, L. Logistic regression and artificial neural network  
835 classification models: a methodology review. *J Biomed Inform* **35**, 352-359,  
836 doi:10.1016/s1532-0464(03)00034-0 (2002).
- 837 76 Tollenaar, N. & van der Heijden, P. G. M. Optimizing predictive performance of criminal  
838 recidivism models using registration data with binary and survival outcomes. *PLoS One*  
839 **14**, e0213245, doi:10.1371/journal.pone.0213245 (2019).
- 840 77 Norton, E. C. & Dowd, B. E. Log Odds and the Interpretation of Logit Models. *Health  
841 Serv Res* **53**, 859-878, doi:10.1111/1475-6773.12712 (2018).
- 842 78 Liu, K. H. & Xu, C. G. A genetic programming-based approach to the classification of  
843 multiclass microarray datasets. *Bioinformatics* **25**, 331-337,  
844 doi:10.1093/bioinformatics/btn644 (2009).
- 845 79 Fadrosch, D. W. *et al.* An improved dual-indexing approach for multiplexed 16S rRNA  
846 gene sequencing on the Illumina MiSeq platform. *Microbiome* **2**, 6, doi:10.1186/2049-  
847 2618-2-6 (2014).
- 848 80 Biesheuvel, C. J., Siccama, I., Grobbee, D. E. & Moons, K. G. Genetic programming  
849 outperformed multivariable logistic regression in diagnosing pulmonary embolism. *J Clin  
850 Epidemiol* **57**, 551-560, doi:10.1016/j.jclinepi.2003.10.011 (2004).

851 81 Staats, K., Pantridge, E., Cavaglia, M., Milovanov, I. & Aniyan, A. TensorFlow Enabled  
852 Genetic Programming. *arXiv e-prints*, arXiv:1708.03157 (2017).

853  
854

855 **Acknowledgements:** The authors thank all patients who participated in this study, as well as Carolyn  
856 Alonso, Javier Villafuerte Gálvez, and the technologists in the Beth Israel Deaconess Medical Center  
857 Clinical Microbiology Laboratory for their help with sample collection. The authors thank Zheng Sun for  
858 valuable discussion on the microbiome data analysis.

859

860 **Funding:** Y.-Y.L. acknowledged grants from National Institutes of Health (R01AI141529,  
861 R01HD093761, UH3OD023268, U19AI095219 and U01HL089856). N.R.P. and C.P.K. acknowledged  
862 grants from National Institutes of Health (R01AI116596) and Institut Mérieux. S.K. was supported by the  
863 China Scholarship Council.

864

865 **Author contributions:** Y.-Y.L., N.R.P., X.C., and C.P.K. conceived and designed the project. C.P.K.,  
866 N.R.P., X.C. and K.D. performed the clinical study. X.C., H.X., and Q.L. contributed to the serum  
867 immune marker measurement. K.W.G. and A.J.G. performed fecal DNA extraction and bacterial 16S  
868 rRNA sequencing. S.K., X.-W.W., and Y.-Y.L. performed all the data analysis and wrote the manuscript.  
869 N.R.P., K.W.G., C.P.K., and K.D. edited the manuscript.

870

871 **Competing interests:** C.P.K. has acted as a paid consultant to Artugen, Facile Therapeutics, First Light  
872 Biosciences, Finch, Matrifax, Merck, Seres Health, and Vedanta and has received grant support from  
873 Merck. X. C. has acted as a paid consultant to Artugen. All other authors report no potential conflicts of  
874 interest.

875

876 **Data and materials availability:** Data will be available from corresponding authors upon reasonable  
877 request.

878

879

880

881

882

883

884

885

886

887

888

889

890

891

892

893

894

895 **Figures**

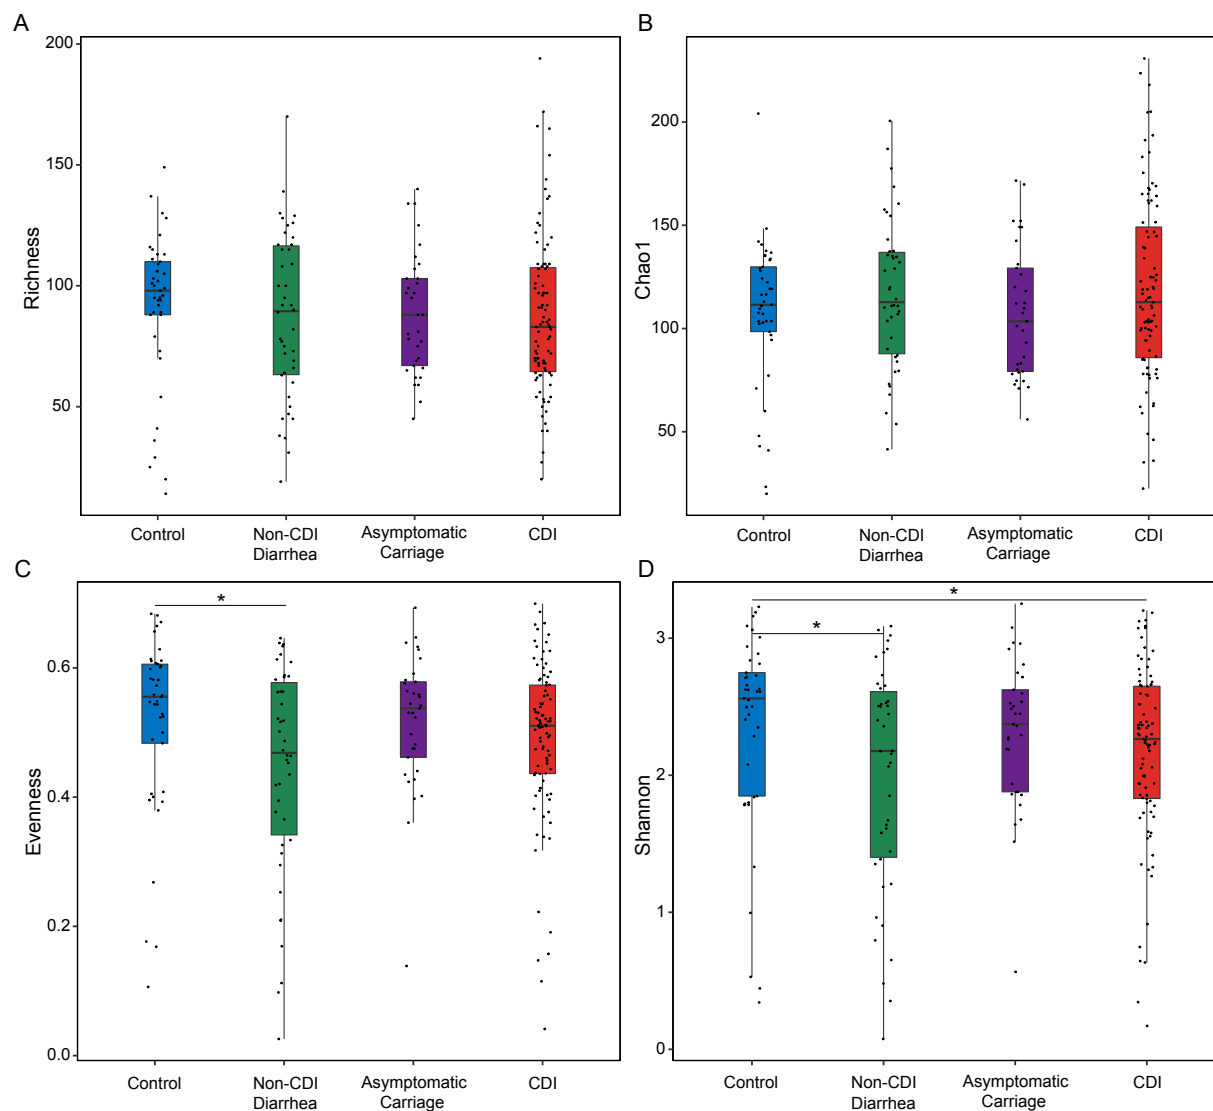

896  
897 **Fig. 1. Comparing the alpha diversity of the gut microbiota of subjects with different *C.***  
898 ***difficile* infection/colonization statuses (Control, Non-CDI Diarrhea, Asymptomatic**  
899 **Carriage, and CDI) using different alpha diversity measures. (A) Taxa richness. (B) Chao1.**  
900 **(C) Evenness. (D) Shannon index. Each dot represents the alpha diversity value of a particular**  
901 **subject's gut microbiota. Statistical significance was determined by Mann-Whitney test,**  
902 **\* $P < 0.05$ .**  
903



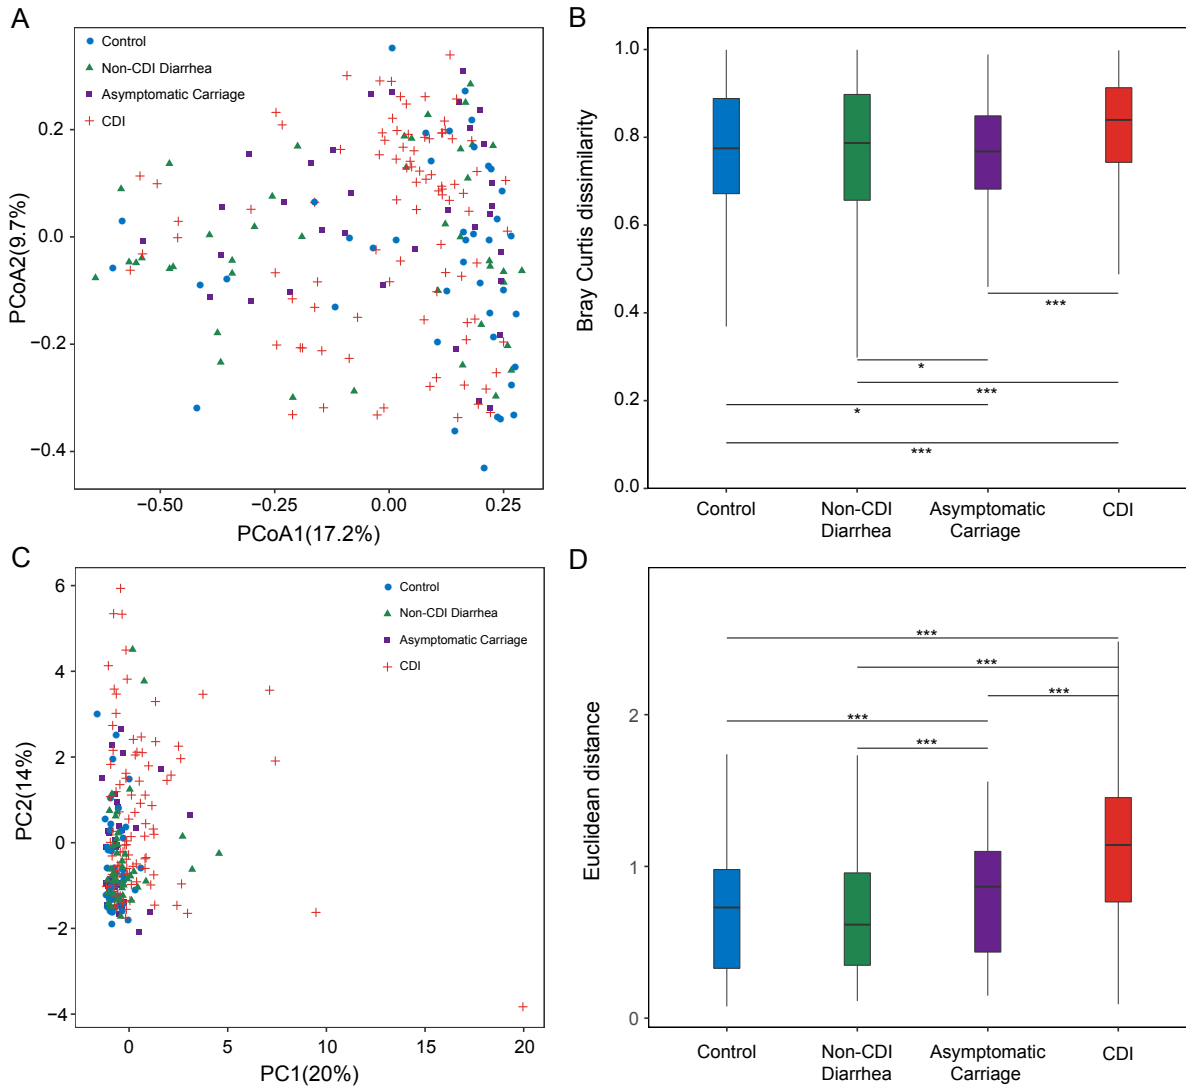

904  
905 **Fig. 2. Ordination analysis and beta diversity comparison of the gut microbiota (and host**  
906 **immune markers) for subjects with different *C. difficile* infection/colonization statuses**  
907 **(Control, Non-CDI Diarrhea, Asymptomatic Carriage, and CDI). (A) Principal Coordinates**  
908 **Analysis (PCoA) plot based on Bray–Curtis dissimilarities of microbial compositions. (B)**  
909 **Boxplot of the gut microbiome Bray–Curtis dissimilarity between subjects within each group.**  
910 **(C) Principle component analysis (PCA) plot of host immune marker concentrations. (D)**  
911 **Boxplot of the Euclidean distance for the host immune markers of subjects within each group.**  
912 **Statistical significance was determined by Mann–Whitney test, \* $P < 0.05$ , \*\* $P < 0.01$ ,**  
913 **\*\*\* $P < 0.001$ .**  
914

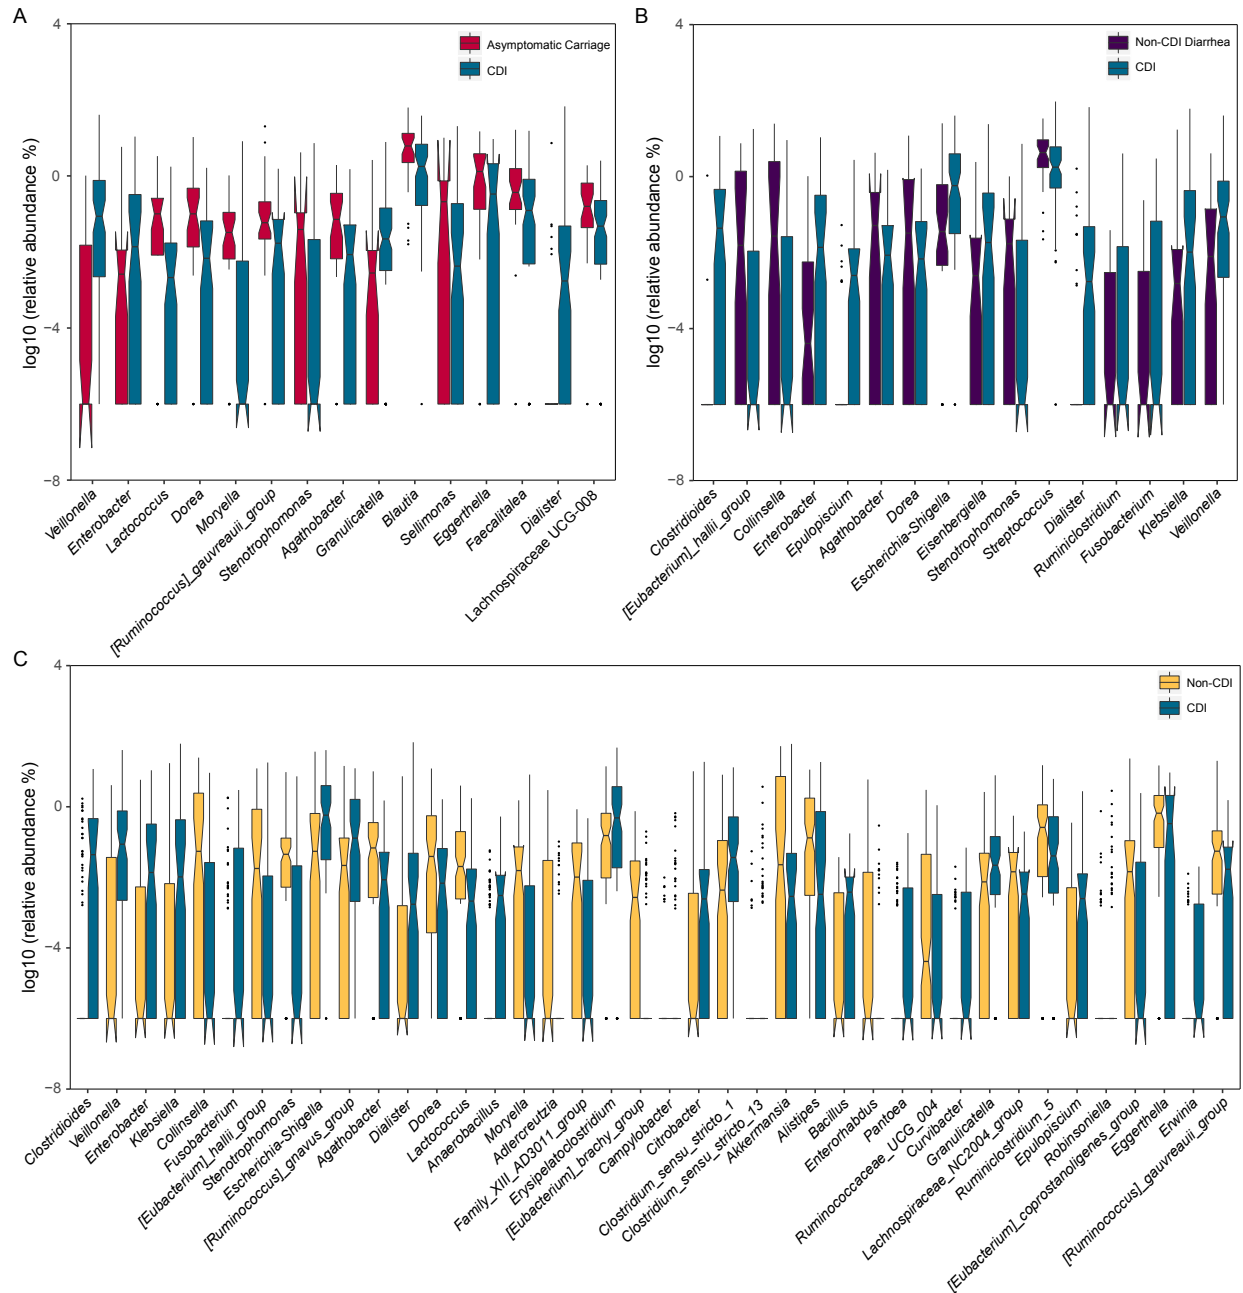

915  
 916 **Fig. 3. Relative abundances of differentially abundant genera identified by ANCOM in**  
 917 **comparing different groups. (A) CDI vs. Asymptomatic Carriage. (B) CDI vs. Non-CDI**  
 918 **Diarrhea. (C) CDI vs. Non-CDI. The top differentially abundant taxa were ranked based on their**  
 919 **W statistics (from left to right). The relative abundance (%) are plotted on log<sub>10</sub> scale. The**  
 920 **notches in the boxplots show the 95% confidence interval around the median.**

921  
 922

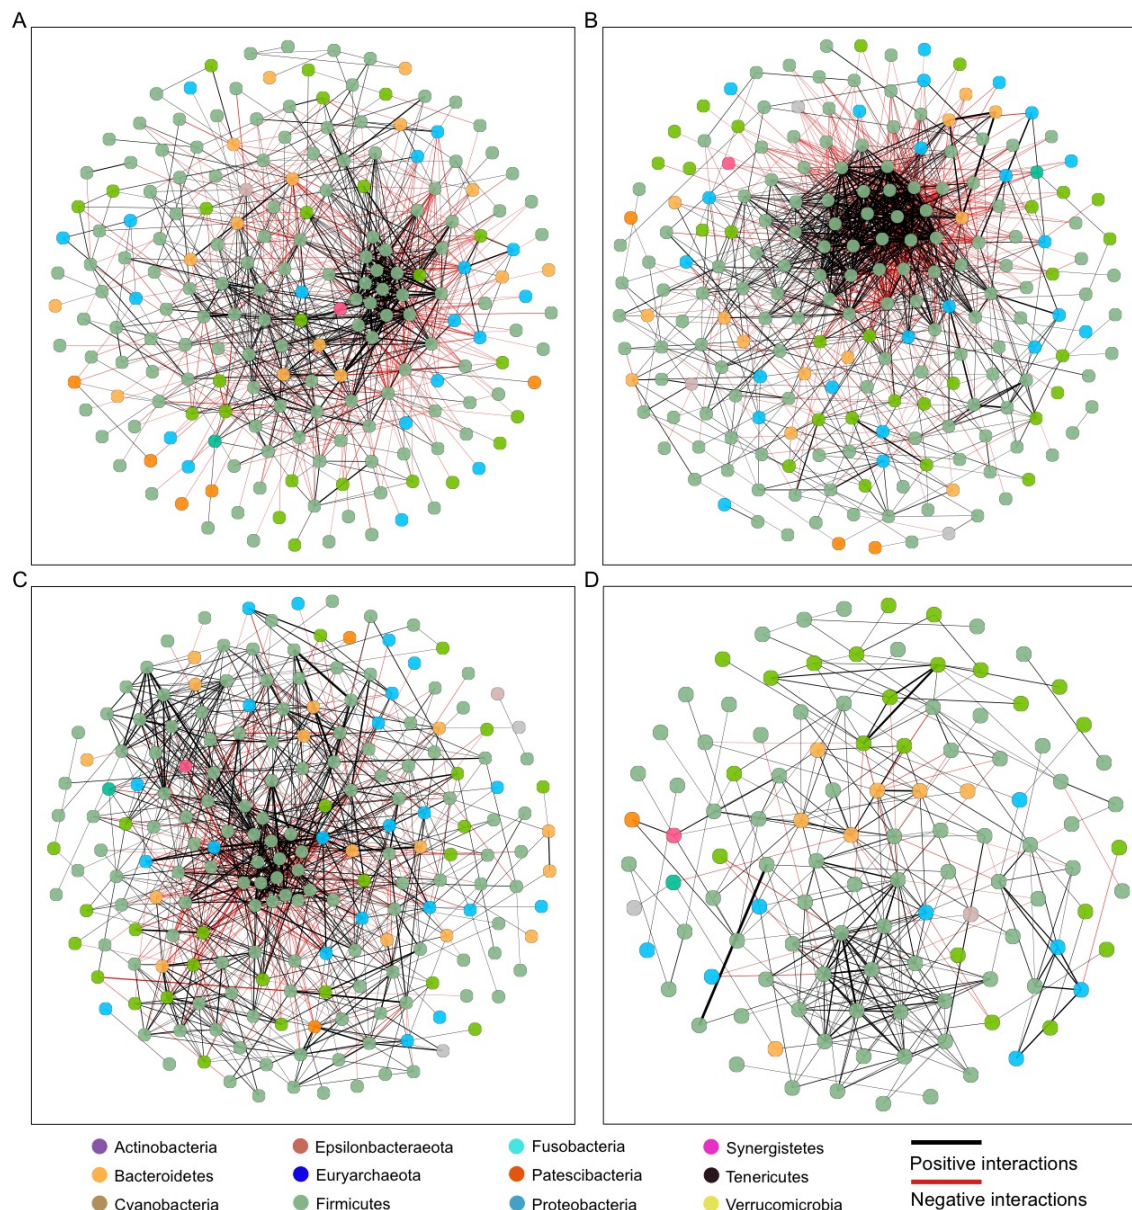

923  
 924 **Fig. 4. Microbial correlation networks of different groups. (A) Control. (B) Non-CDI**  
 925 **Diarrhea. (C) Asymptomatic Carriage. (D) CDI.** Nodes represent genera and are colored based  
 926 on their phylum. Edges represent microbial correlations: green/red means positive/negative  
 927 correlations, respectively. Edge thickness indicates correlation strength, and only the high-  
 928 confidence interactions ( $p$ -value < 0.05) with high absolute correlation coefficients (> 0.3) were  
 929 presented. For each group, we further identified the top-three most connected genera/nodes.  
 930 They are *Ruminococcus\_1*, *Roseburia* and *Lachnospiraceae\_UCG-008* for the Control group,  
 931 *[Ruminococcus]\_torques\_group*, *[Eubacterium]\_hallii\_group* and *Blautia* for the Non-CDI  
 932 Diarrhea group, *Ruminiclostridium\_5*, *Enterococcus* and *Lachnospiraceae\_UCG\_008* for the  
 933 Asymptomatic Carriage group, and *Alistipes*, *Ruminiclostridium\_5* and *Lachnoclostridium* for  
 934 the CDI group.

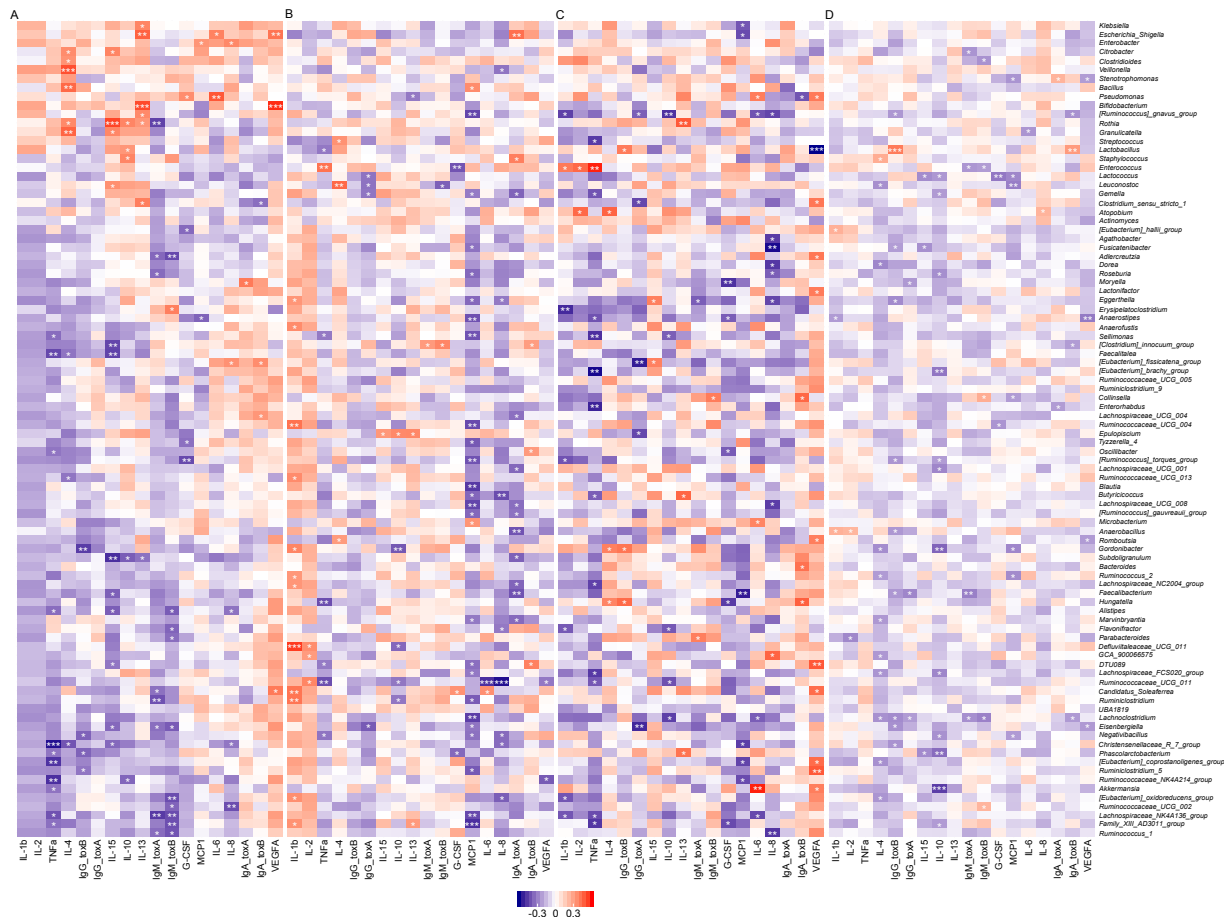

935  
 936 **Fig. 5. Correlations between gut microbial abundances and host immune markers in**  
 937 **different groups, quantified by Spearman correlation with Benjamini-Hochberg correction.**  
 938 (A) Control. (B) Non-CDI Diarrhea. (C) Asymptomatic Carriage. (D) CDI. Rows represent  
 939 genera; columns represent immune markers. The layout of the heatmap is followed the  
 940 hierarchical clustering results of Control cohort (see Fig.S4). Red/blue represents  
 941 positive/negative correlation, respectively. The intensity of the colors denotes the strength of the  
 942 correlation. \* $\alpha < 0.05$ , \*\* $\alpha < 0.01$ , \*\*\* $\alpha < 0.001$ .

943  
 944

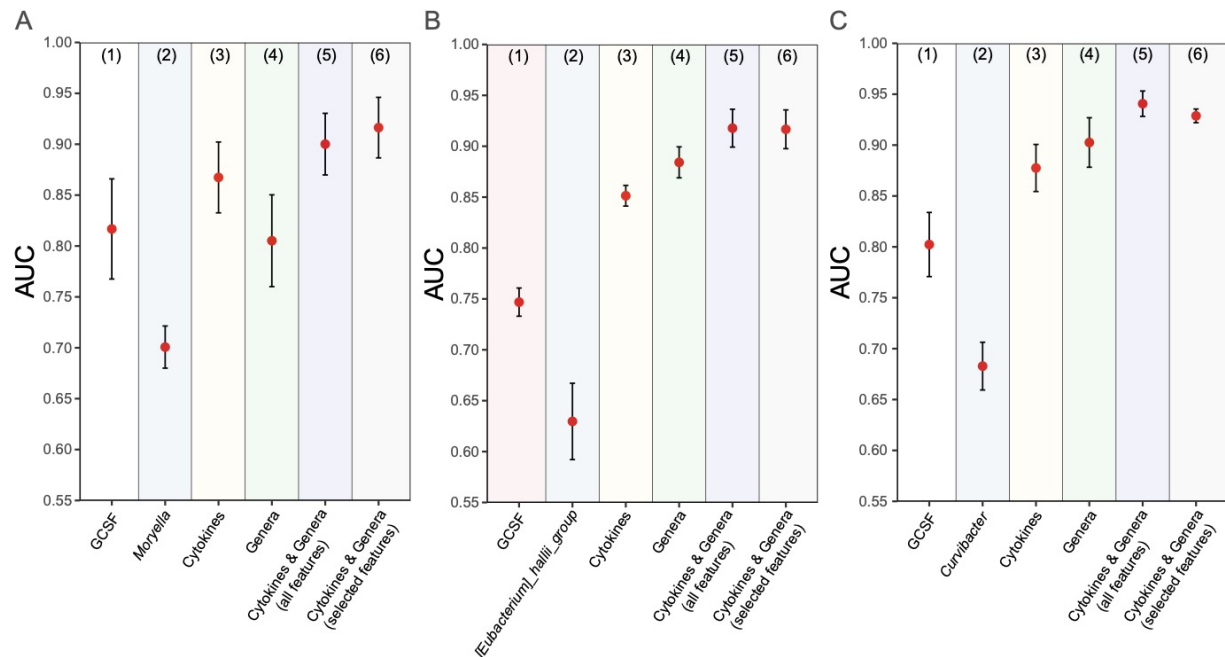

945  
 946 **Fig. 6. The performance of RF-based classification models based on various types of**  
 947 **features in differentiating CDI from other groups. (A) CDI vs. Asymptomatic Carriage. (B)**  
 948 **CDI vs. Non-CDI Diarrhea. (C) CDI vs. Non-CDI. For each classification task, we used different**  
 949 **types of features: (1) the top-1 immune marker feature (based on mean decrease accuracy); (2)**  
 950 **the top-1 genus feature; (3) all immune markers; (4) all genera; (5) integration of all immune**  
 951 **markers and genera; (6) selected features from the set of all immune markers and genera. Error**  
 952 **bars represent the standard errors of the means (SEM).**

953  
 954  
 955  
 956  
 957  
 958  
 959  
 960  
 961  
 962  
 963  
 964  
 965  
 966  
 967  
 968  
 969  
 970  
 971



972 **Table 1. Demographic characteristics of the enrolled subjects.**

973

| Characteristics      | NAAT negative  |                         | NAAT positive                |               |
|----------------------|----------------|-------------------------|------------------------------|---------------|
|                      | Control (n=47) | Non-CDI Diarrhea (n=44) | Asymptomatic Carriage (n=40) | CDI (n=112)   |
| <b>Sex</b>           |                |                         |                              |               |
| Female               | 14 (29.79%)    | 22 (50.00%)             | 20 (50.00%)                  | 61 (54.46%)   |
| Male                 | 33 (70.21%)    | 22 (50.00%)             | 20 (50.00%)                  | 51 (45.54%)   |
| <b>Age, Avg ± SD</b> | 62.40 ± 12.33  | 63.07 ± 13.15           | 62.15 ± 17.25                | 64.99 ± 15.62 |
| <b>Ethnicity</b>     |                |                         |                              |               |
| Hispanic             | 1 (2.13%)      | 3 (6.82%)               | 1 (2.50%)                    | 6 (5.36%)     |
| Non-Hispanic         | 38 (80.85%)    | 37 (84.09%)             | 31 (77.50%)                  | 96 (85.71%)   |
| Unknown              | 8 (17.02%)     | 4 (9.09%)               | 8 (20.00%)                   | 10 (8.93%)    |
| <b>Race</b>          |                |                         |                              |               |
| White                | 33 (70.21%)    | 28 (63.64%)             | 28 (70.00%)                  | 89 (79.46%)   |
| Other                | 4 (8.51%)      | 10 (22.73%)             | 3 (7.50%)                    | 23 (20.54%)   |
| Unknown              | 10 (21.28%)    | 6 (13.64%)              | 9 (22.50%)                   | 0 (0.00%)     |

974

975

976

977

978

979

980

981

982

983

984

985

986

987

988

989

990

991

992

993

994

995

996

997 **Table 2. Diagnostic scores derived from symbolic classification (SC) and logistic regression**  
 998 **(LR).** For each subject  $i$ , we calculate his/her diagnostic score  $f(i)$  (or  $p(i)$ ) based on one of the  
 999 following formulas derived from SC (or LR), respectively. For SC, the class of subject  $i$  is CDI  
 1000 if  $f(i) > 0$ ; or Asymptomatic Carriage (or Non-CDI Diarrhea, Non-CDI) if  $f(i) \leq 0$ . For LR,  
 1001 the class of subject  $i$  is CDI if  $p(i) \geq 0.5$ ; or Asymptomatic Carriage (or Non-CDI Diarrhea,  
 1002 Non-CDI) if  $p(i) < 0.5$ . Here, both  $f(i)$  and  $p(i)$  were learned from the entire dataset. Features  
 1003 used here include:  $x_1$ : GCSF;  $x_2$ : IgA\_toxA;  $x_3$ : IgA\_toxB;  $x_4$ : IL6;  $x_5$ : TNF $\alpha$ ;  $x_6$ :  
 1004 *Anaerobacillus*;  $x_7$ : *Curvibacter*;  $x_8$ : *Enterobacter*;  $x_9$ : *Enterococcus*;  $x_{10}$ : *Epulopiscium*;  $x_{11}$ :  
 1005 [*Eubacterium*] *haillii\_group*;  $x_{12}$ : *Fusobacterium*;  $x_{13}$ : *Moryella*;  $x_{14}$ : *Stenotrophomonas*;  $x_{15}$ :  
 1006 *Veillonella*. In particular, for each classification task (regardless of using SC or LR), the  
 1007 following selected features were: (1) CDI vs. Asymptomatic Carriage:  $x_1, x_4, x_{13}$  and  $x_{15}$ ; (2)  
 1008 CDI vs. Non-CDI Diarrhea:  $x_1, x_2, x_9, x_{10}$ , and  $x_{11}$ ; (3) CDI vs. Non-CDI:  $x_1, x_3, x_4, x_5, x_6, x_7,$   
 1009  $x_8, x_{12}, x_{14}$  and  $x_{15}$ . Note that in the calculation of precision, recall and F1-score, we can treat  
 1010 either CDI (or Asymptomatic Carriage, Non-CDI Diarrhea, Non-CDI) as the true positive.  
 1011 Results shown in the parenthesis represent the latter case.  
 1012

| Model | Diagnostic                    | Formula                                                                                                                                                                                                    | Accuracy | Precision        | Recall           | F1-score         |
|-------|-------------------------------|------------------------------------------------------------------------------------------------------------------------------------------------------------------------------------------------------------|----------|------------------|------------------|------------------|
| SC    | CDI vs. Asymptomatic Carriage | $f(i) = x_1 * x_{15}(x_1^3 - 0.2 * x_{13} + 0.4) + 1.1 * x_1 - 0.1 * x_4 - 18.25$                                                                                                                          | 0.896    | 0.914<br>(0.840) | 0.949<br>(0.75)  | 0.931<br>(0.792) |
|       | CDI vs. Non-CDI Diarrhea      | $f(i) = x_9 * x_2(0.5 * x_{10} - 1) + x_{11}(0.02 * x_{11} - x_1) + x_2 \left(1 - \frac{10}{x_1}\right) - \frac{0.003}{x_9}$                                                                               | 0.900    | 0.946<br>(0.826) | 0.897<br>(0.905) | 0.921<br>(0.864) |
|       | CDI vs. Non-CDI               | $f(i) = x_1 * x_3(0.2 * x_1 * x_5 * x_6 * x_{14} + 0.04 * x_1 * x_7 + 0.3 * x_1 * x_{15} * x_8^4 + x_1 * x_{12}(0.5 * x_7 + x_1 * x_{14}) + x_7(0.1 * x_4 - x_6) + x_{14}(x_{14} - 2)$                     | 0.882    | 0.889<br>(0.878) | 0.821<br>(0.927) | 0.853<br>(0.902) |
| LR    | CDI vs. Asymptomatic Carriage | $\log\left(\frac{p(i)}{1-p(i)}\right) = 0.66725 - 0.04442 * x_1 + 0.01022 * x_4 + 7.51484 * x_{13} - 85.00213 * x_{15}$                                                                                    | 0.830    | 0.895<br>(0.667) | 0.872<br>(0.714) | 0.883<br>(0.690) |
|       | CDI vs. Non-CDI Diarrhea      | $\log\left(\frac{p(i)}{1-p(i)}\right) = 0.01974 - 0.002084 * x_1 - 0.02391 * x_2 + 1.895 * x_9 - 12740 * x_{10} + 163.9 * x_{11}$                                                                          | 0.800    | 0.814<br>(0.765) | 0.897<br>(0.619) | 0.854<br>(0.684) |
|       | CDI vs. Non-CDI               | $\log\left(\frac{p(i)}{1-p(i)}\right) = 2.122 - 0.01002 * x_1 + 0.01833 * x_3 - 0.006334 * x_4 - 0.009566 * x_5 - 4609 * x_6 - 8576 * x_7 - 40.75 * x_8 - 101.1 * x_{12} + 32.84 * x_{14} - 43.4 * x_{15}$ | 0.813    | 0.841<br>(0.798) | 0.679<br>(0.908) | 0.752<br>(0.850) |

1013

1014

1015

## 1016 **Supplementary Materials**

1017

1018 Fig. S1. The “driver” taxa responsible for the change of microbial correlations between CDI and  
1019 Asymptomatic Carriage

1020 Fig. S2. The “driver” taxa responsible for the change of microbial correlations between CDI and  
1021 Non-CDI Diarrhea.

1022 Fig. S3. The “driver” taxa responsible for the change of microbial correlations between CDI and  
1023 Non-CDI.

1024 Fig. S4. Significant correlations between gut microbial abundances and host immune markers in  
1025 the Control group.

1026 Fig. S5. Gut microbiota and host immune markers can accurately differentiate different groups in  
1027 multi-class classification models.

1028 Fig. S6. Using the mean decrease accuracy (MDA) ranking and the 1-SE rule to select features to  
1029 distinguish CDI from other groups.

1030 Fig. S7. The fitness evolution during the genetic programming.

1031 Table S1. Sample sizes of different data types in different groups.

1032 Table S2. Permutational multivariate analysis of variance (PERMANOVA) in microbial  
1033 compositions and immune markers.

1034 Table S3. Differentially abundant genera between CDI and Asymptomatic Carriage groups  
1035 detected by ANCOM, adjusted for age and sex.

1036 Table S4. Differentially abundant genera between CDI and Non-CDI Diarrhea groups detected  
1037 by ANCOM, adjusted for age and sex.

1038 Table S5. Differentially abundant genera between CDI and Non-CDI groups detected by  
1039 ANCOM, adjusted for age and sex.

1040 Table S6. Characteristics of microbial correlation networks associated with different groups.

1041 Table S7. Comparison of host immune markers in different groups.

1042 Table S8. Accuracy, Precision, Recall and F1-score of symbolic classification in CDI diagnosis.

1043

1044

1045

1046

1047

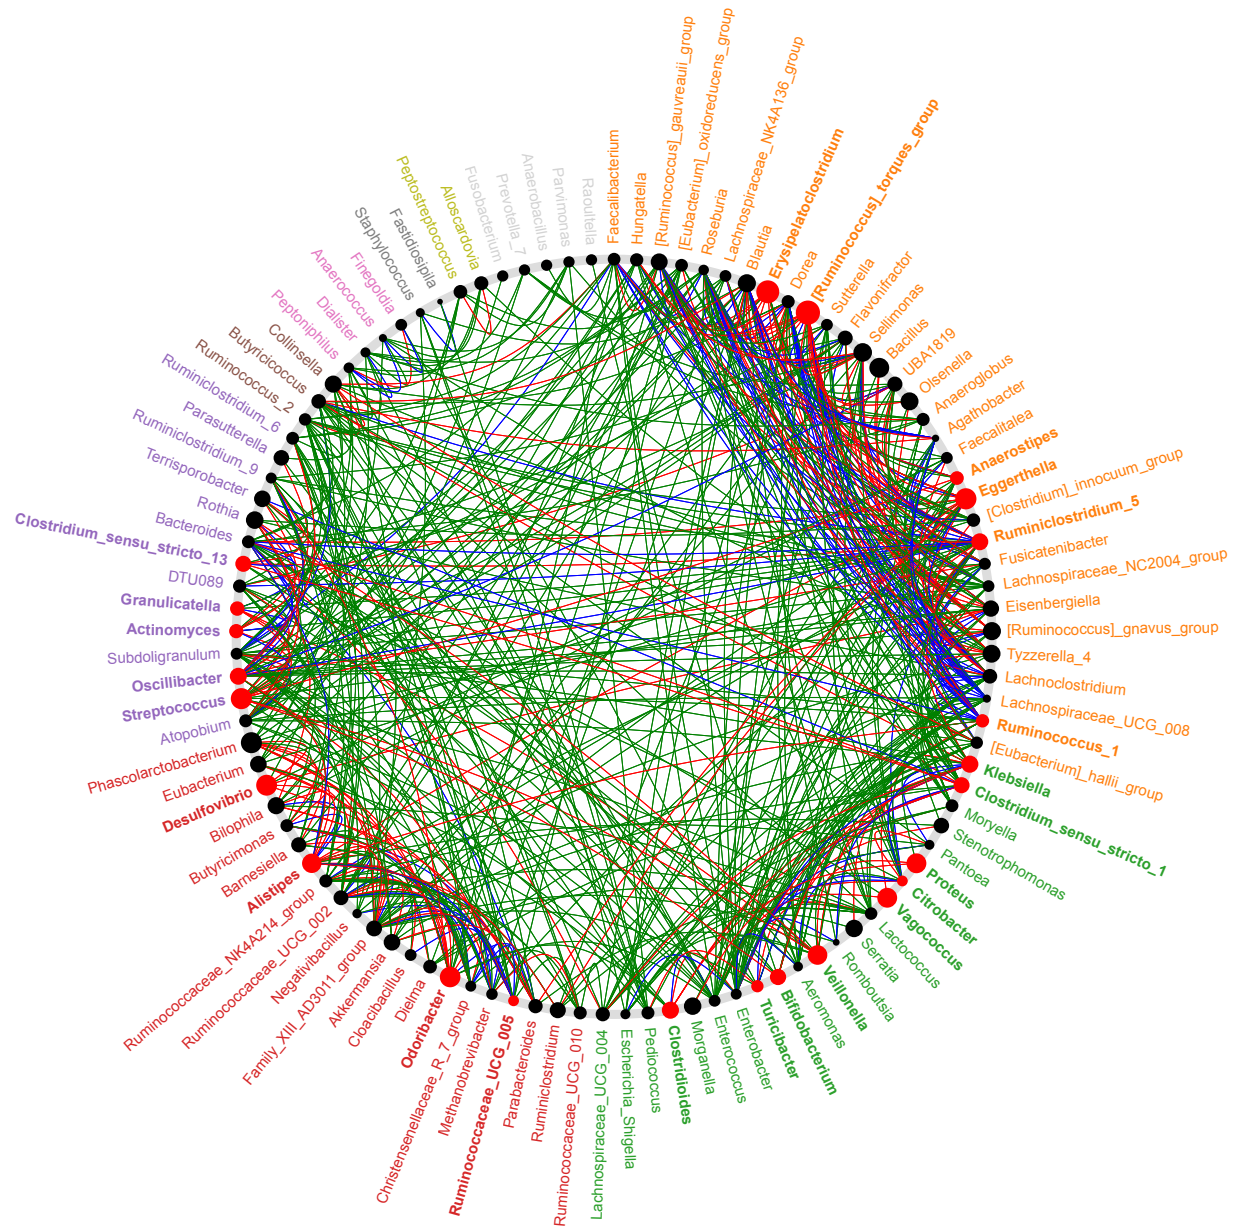

1048  
1049 **Fig. S1. The “driver” taxa responsible for the change of microbial correlations between**  
1050 **CDI and Asymptomatic Carriage.** Node sizes are proportional to their scaled neighbor shift  
1051 (NESH) score (i.e., a score identifying important microbial taxa of microbial association  
1052 networks) and a node is colored red if its betweenness increases when comparing microbial  
1053 correlation networks of CDI with that of Asymptomatic Carriage. All taxa belonging to same  
1054 community (common sub-network) are randomly assigned a color to their labels. Red (or green)  
1055 edges represent microbial correlations that are only present in the CDI (or Asymptomatic  
1056 Carriage) network, respectively. Blue edges present common microbial correlations that are  
1057 present in both networks.



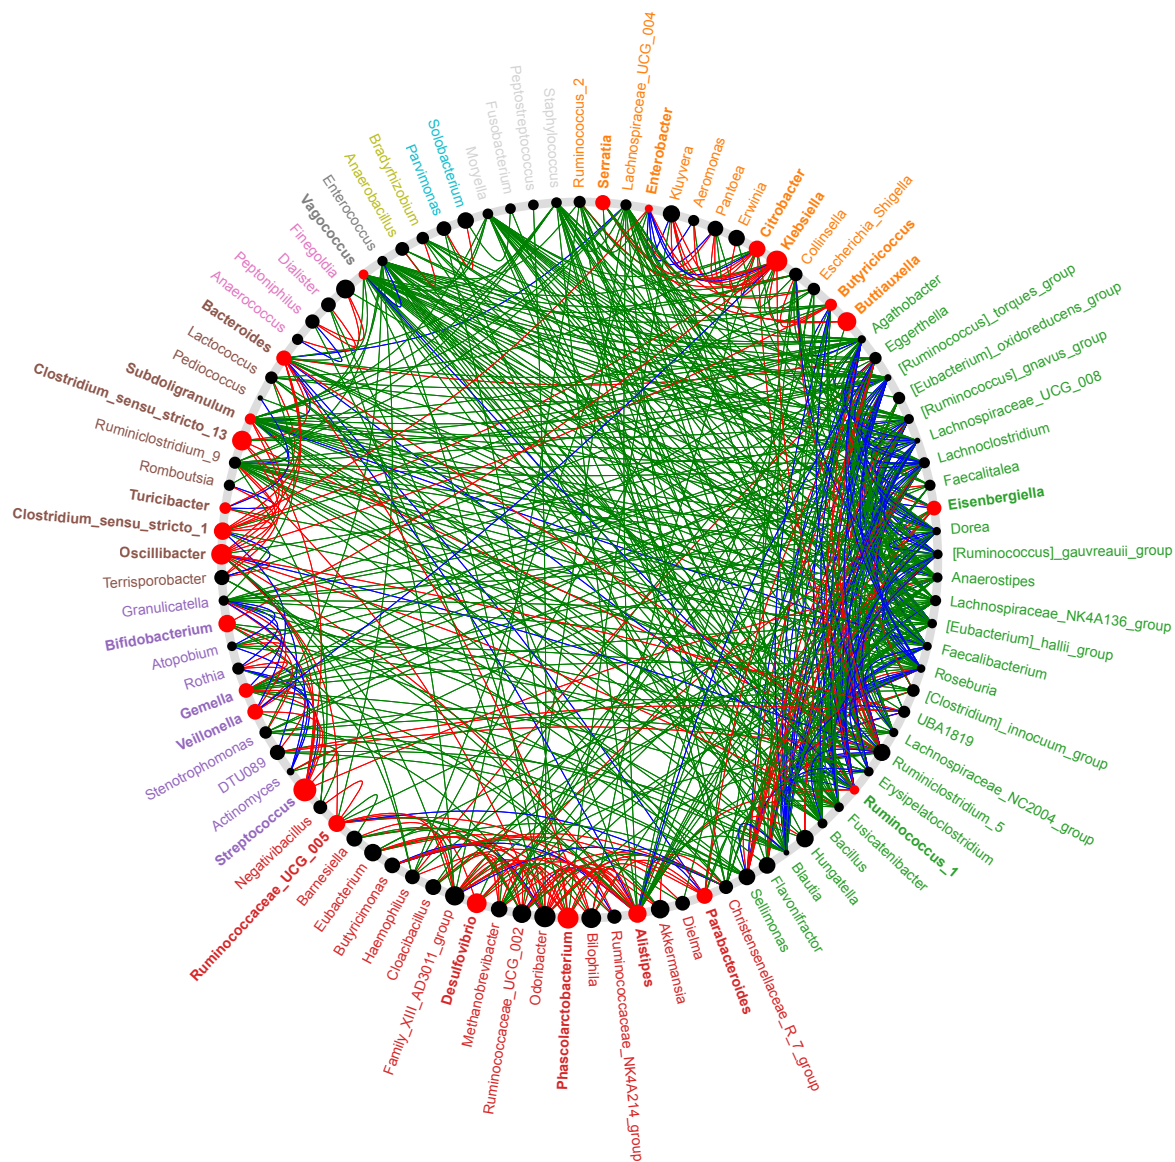

1058  
1059 **Fig. S2. The “driver” taxa responsible for the change of microbial correlations between**  
1060 **CDI and Non-CDI Diarrhea.** Node sizes are proportional to their scaled NESH score and a  
1061 node is colored red if its betweenness increases when comparing microbial correlation networks  
1062 of CDI with that of Non-CDI Diarrhea. All taxa belonging to same community (common sub-  
1063 network) are randomly assigned a color to their labels. Red (or green) edges represent microbial  
1064 correlations that are only present in the CDI (or Non-CDI Diarrhea) network, respectively. Blue  
1065 edges present common microbial correlations that are present in both networks.  
1066  
1067



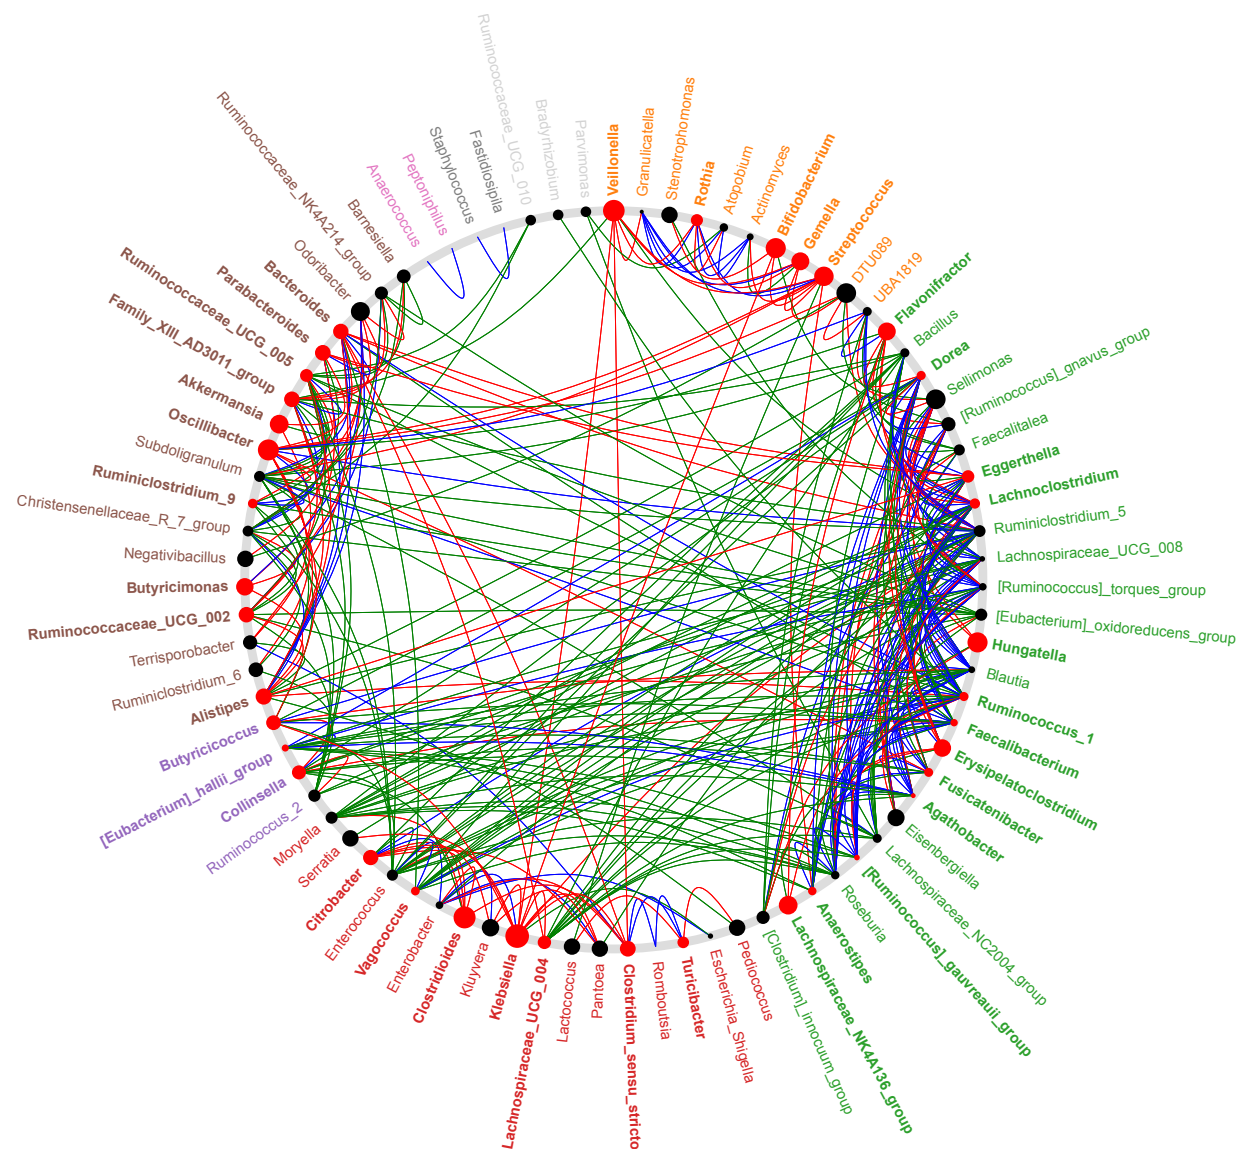

1068  
1069 **Fig. S3. The potential “driver taxa” responsible for the change of microbial correlations**  
1070 **between CDI and Non-CDI.** Node sizes are proportional to their scaled NESH score and a node  
1071 is colored red if its betweenness increases when comparing microbial correlation networks of  
1072 CDI with that of Non-CDI. All taxa belonging to same community (common sub-network) are  
1073 randomly assigned a color to their labels. Red (or green) edges represent microbial correlations  
1074 that are only present in the CDI (or Non-CDI) network, respectively. Blue edges present  
1075 common microbial correlations that are present in both networks.  
1076  
1077  
1078

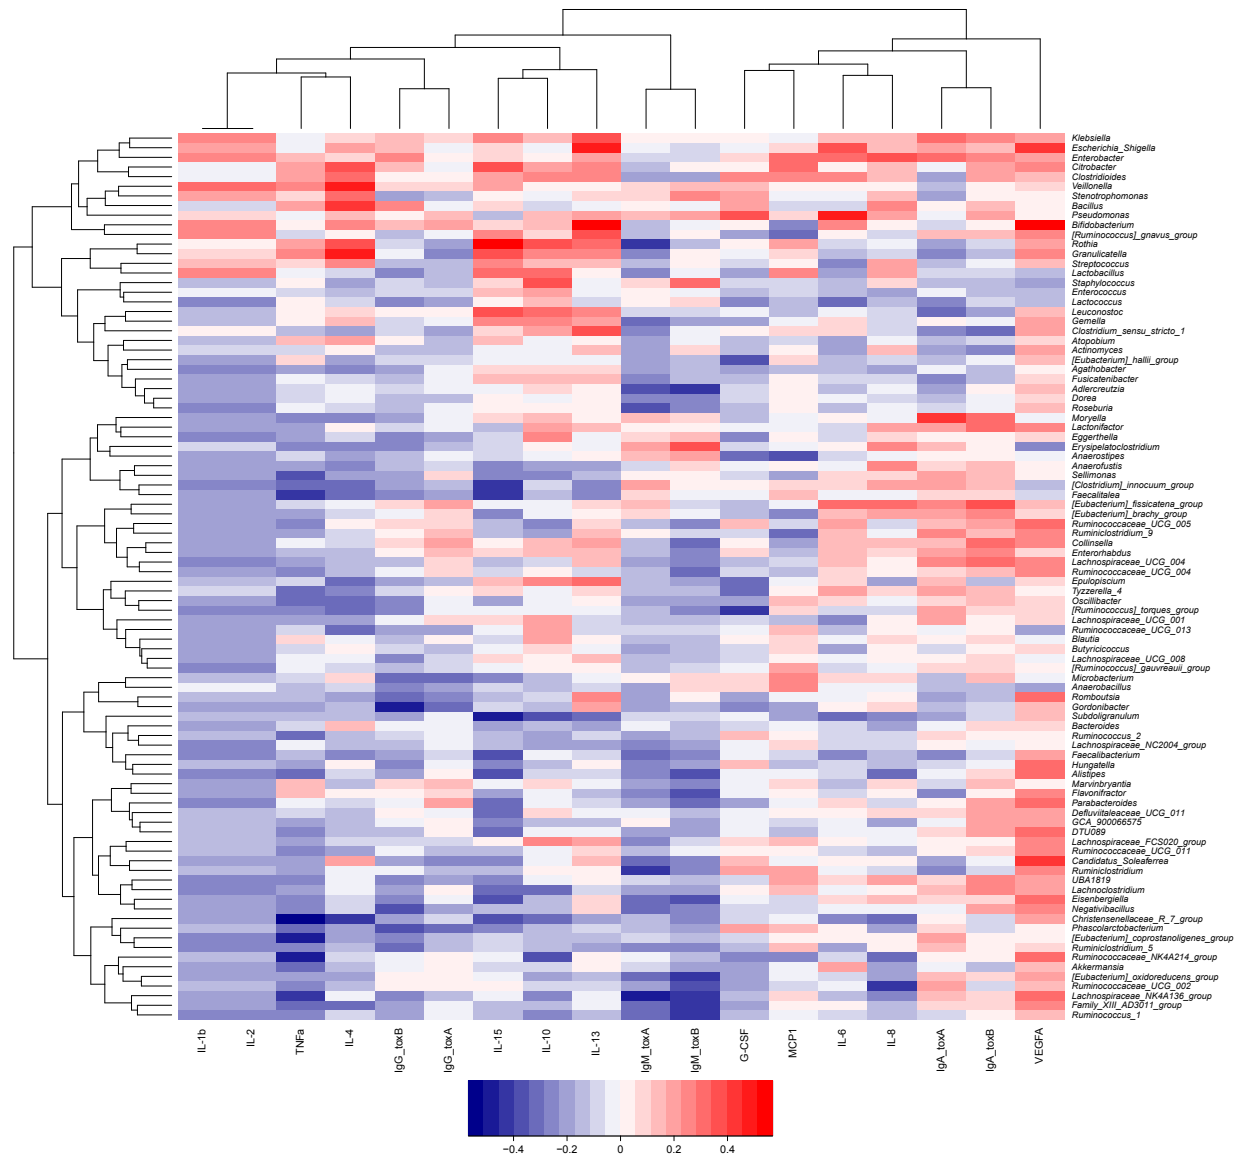

1079  
 1080 **Fig. S4. Significant correlations between gut microbial abundances and host immune**  
 1081 **markers in the Control group.** Gut microbial compositions and host immune markers were  
 1082 clustered through hierarchical clustering. Rows correspond to bacterial taxa at genus level;  
 1083 columns correspond to host immune markers. Red/blue represents positive/negative association,  
 1084 respectively. The intensity of the colors denotes the strength of correlation between the genus  
 1085 abundance and the immunological expression level.

1086  
 1087  
 1088  
 1089  
 1090  
 1091  
 1092

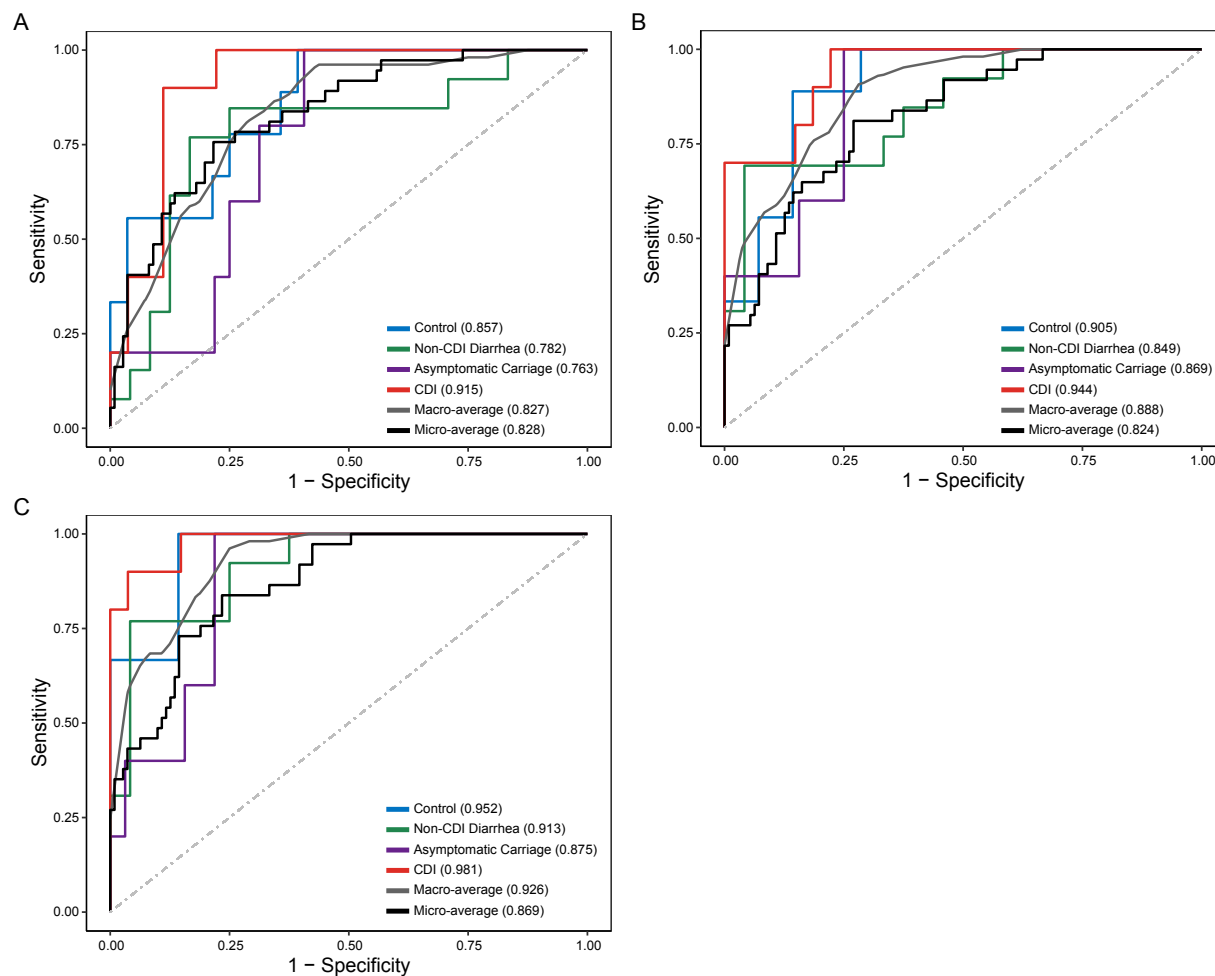

1093  
1094 **Fig. S5. Gut microbiota and host immune markers can accurately differentiate different**  
1095 **groups in multi-class classification models. (A) Use host immune markers alone. (B) Use gut**  
1096 **microbiota data (at genus level) alone. (C) The integration of host immune markers and**  
1097 **microbial data. The performance of each classifier is measured by the macro-average and micro-**  
1098 **average AUCs.**

1099  
1100  
1101  
1102  
1103  
1104  
1105  
1106

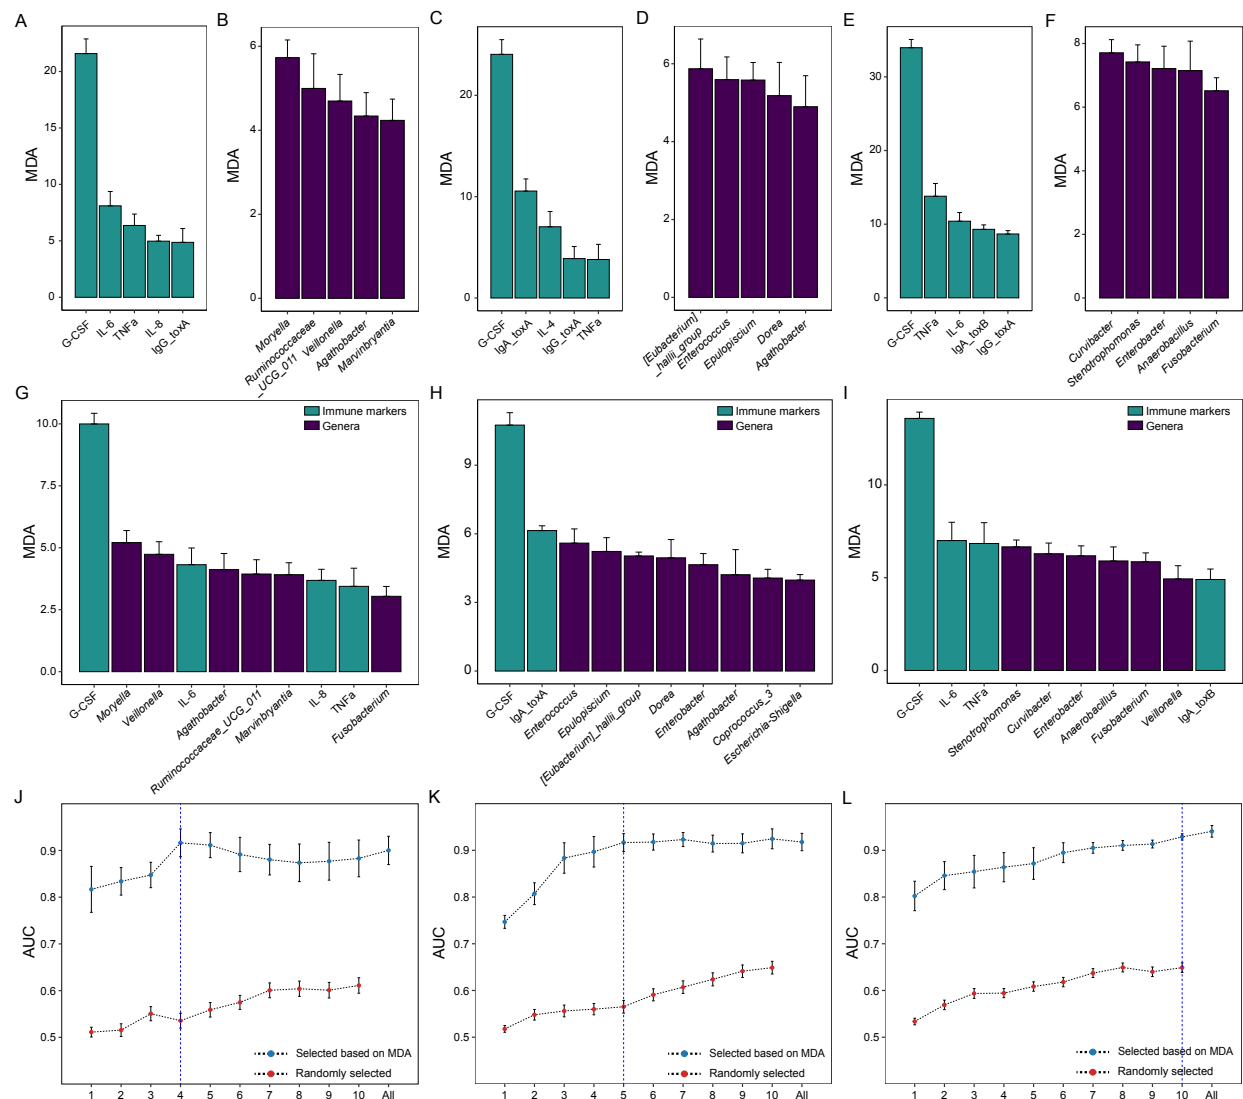

1107  
 1108  
 1109 **Fig. S6. Using the mean decrease accuracy (MDA) ranking and the 1-SE rule to select**  
 1110 **features to distinguish CDI from other groups.** The most important features of cytokine data,  
 1111 microbiome data, and the integration of cytokines and microbiome data in classifying CDI vs.  
 1112 Asymptomatic Carriage (**A, B and G**), CDI vs. Non-CDI Diarrhea (**C, D and H**) and CDI vs.  
 1113 Non-CDI (**E, F and I**). The performance of classifiers using different sets of integrated features:  
 1114 selected based on MDA or randomly selected in CDI vs Asymptomatic Carriage (**J**), CDI vs  
 1115 Non-CDI Diarrhea (**K**) and CDI vs Non-CDI (**L**). The minimum set of features selected based on  
 1116 the MDA ranking and the 1-SE rule is highlighted by a vertical blue dashed line. Error bars  
 1117 represent the standard errors of the means (SEM).  
 1118  
 1119  
 1120  
 1121

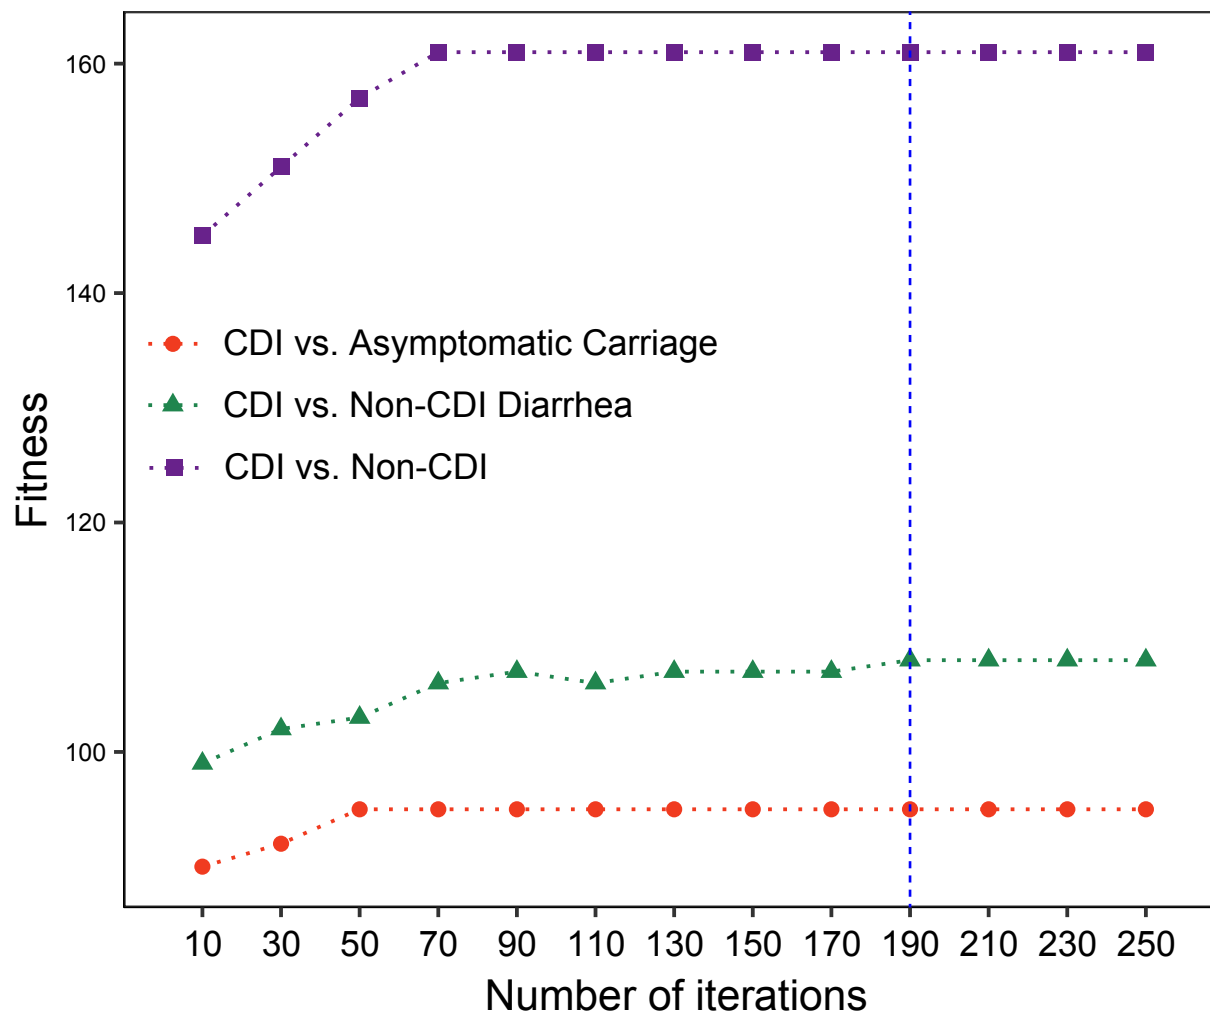

1122  
1123 **Fig. S7. The fitness evolution during the symbolic classification based on genetic**  
1124 **programming.** The fitness function is a maximization function, and the tree with highest fitness  
1125 score in each iteration were plotted. The final selected number of generations is highlighted with  
1126 a vertical blue dashed line.

1127  
1128  
1129  
1130  
1131  
1132  
1133  
1134  
1135  
1136  
1137  
1138



1139 **Table S1. Sample sizes of different data types in different groups.**

1140

| <b>Characteristics</b>            | <b>NAAT negative</b> |                             | <b>NAAT positive</b>             |            | <b>Total</b> |
|-----------------------------------|----------------------|-----------------------------|----------------------------------|------------|--------------|
|                                   | <b>Control</b>       | <b>Non-CDI<br/>Diarrhea</b> | <b>Asymptomatic<br/>Carriage</b> | <b>CDI</b> |              |
| Immunological data                | 45                   | 44                          | 35                               | 99         | 223          |
| Microbial data                    | 41                   | 42                          | 33                               | 91         | 207          |
| Immunological &<br>microbial data | 39                   | 42                          | 28                               | 78         | 187          |

1141

1142

1143

1144

1145

1146

1147

1148

1149

1150

1151

1152

1153

1154

1155

1156

1157

1158

1159

1160

1161

1162

1163

1164

1165

1166

1167

1168

1169

1170

1171

1172

1173 **Table S2. Permutational multivariate analysis of variance (PERMANOVA) in microbial**  
1174 **compositions and immune markers.** CDI statuses: Control, Non-CDI Diarrhea, Asymptomatic  
1175 Carriage, and CDI. Race: White, Native American, Asian, African American, Pacific Islander  
1176 and mixed origin. Ethnicity: Hispanic and Not Hispanic. Here F represents the F-statistic: a  
1177 larger F value indicate that the between-group variation is greater than within-group variation. R<sup>2</sup>  
1178 represents the variation explained by the model. P represents the *P*-value calculated from  
1179 permutation.

| Test factors | Microbiome |                |       | Cytokines |                |       |
|--------------|------------|----------------|-------|-----------|----------------|-------|
|              | F          | R <sup>2</sup> | P     | F         | R <sup>2</sup> | P     |
| CDI status   | 2.285      | 0.0388         | 0.001 | 3.351     | 0.052          | 0.016 |
| Age          | 1.605      | 0.009          | 0.081 | 0.541     | 0.003          | 0.516 |
| Sex          | 1.557      | 0.009          | 0.095 | 0.916     | 0.005          | 0.372 |
| Race         | 0.881      | 0.031          | 0.832 | 1.595     | 0.050          | 0.153 |
| Ethnicity    | 0.476      | 0.003          | 0.961 | 0.206     | 0.001          | 0.771 |

1180  
1181  
1182  
1183  
1184  
1185  
1186  
1187  
1188  
1189  
1190  
1191  
1192  
1193  
1194  
1195  
1196  
1197  
1198  
1199  
1200  
1201  
1202  
1203  
1204  
1205  
1206

1207 **Table S3. Differentially abundant genera between CDI and Asymptomatic Carriage groups**  
 1208 **detected by ANCOM, adjusted for age and sex.** For each genus, the first column represents its  
 1209 W statistic, and subsequent four columns represent logical indicators of whether it is  
 1210 differentially abundant under a series of cutoffs (0.9, 0.8, 0.7 and 0.6). The last two columns  
 1211 represent its relative abundance (mean  $\pm$  standard deviation) in the two groups.  
 1212

| Genera                                 | W_stat | Cutoff 0.9 | Cutoff 0.8 | Cutoff 0.7 | Cutoff 0.6 | Relative abundance (%) in CDI | Relative abundance (%) in Asymptomatic Carriage |
|----------------------------------------|--------|------------|------------|------------|------------|-------------------------------|-------------------------------------------------|
| <i>Veillonella</i>                     | 204    | TRUE       | TRUE       | TRUE       | TRUE       | 1.86 $\pm$ 5.55               | 0.06 $\pm$ 0.20                                 |
| <i>Enterobacter</i>                    | 182    | FALSE      | TRUE       | TRUE       | TRUE       | 0.79 $\pm$ 1.81               | 0.20 $\pm$ 1.01                                 |
| <i>Lactococcus</i>                     | 179    | FALSE      | TRUE       | TRUE       | TRUE       | 0.10 $\pm$ 0.30               | 0.36 $\pm$ 0.69                                 |
| <i>Dorea</i>                           | 177    | FALSE      | TRUE       | TRUE       | TRUE       | 0.10 $\pm$ 0.26               | 0.79 $\pm$ 2.00                                 |
| <i>Moryella</i>                        | 174    | FALSE      | TRUE       | TRUE       | TRUE       | 0.20 $\pm$ 1.19               | 0.13 $\pm$ 0.24                                 |
| <i>[Ruminococcus]_gauvreauii_group</i> | 173    | FALSE      | TRUE       | TRUE       | TRUE       | 0.09 $\pm$ 0.26               | 1.10 $\pm$ 3.68                                 |
| <i>Stenotrophomonas</i>                | 167    | FALSE      | TRUE       | TRUE       | TRUE       | 0.13 $\pm$ 0.79               | 0.28 $\pm$ 0.76                                 |
| <i>Agathobacter</i>                    | 158    | FALSE      | FALSE      | TRUE       | TRUE       | 0.07 $\pm$ 0.19               | 0.25 $\pm$ 0.42                                 |
| <i>Granulicatella</i>                  | 157    | FALSE      | FALSE      | TRUE       | TRUE       | 0.31 $\pm$ 1.10               | 0.10 $\pm$ 0.46                                 |
| <i>Blautia</i>                         | 154    | FALSE      | FALSE      | TRUE       | TRUE       | 5.30 $\pm$ 7.99               | 10.18 $\pm$ 14.05                               |
| <i>Sellimonas</i>                      | 150    | FALSE      | FALSE      | TRUE       | TRUE       | 0.46 $\pm$ 2.18               | 1.20 $\pm$ 2.50                                 |
| <i>Eggerthella</i>                     | 147    | FALSE      | FALSE      | TRUE       | TRUE       | 1.39 $\pm$ 2.16               | 2.98 $\pm$ 4.06                                 |
| <i>Faecalitalea</i>                    | 145    | FALSE      | FALSE      | TRUE       | TRUE       | 0.91 $\pm$ 2.07               | 1.41 $\pm$ 3.05                                 |
| <i>Dialister</i>                       | 141    | FALSE      | FALSE      | FALSE      | TRUE       | 1.10 $\pm$ 7.07               | 0.23 $\pm$ 1.27                                 |
| <i>Lachnospiraceae_UCG_008</i>         | 135    | FALSE      | FALSE      | FALSE      | TRUE       | 0.20 $\pm$ 0.39               | 0.37 $\pm$ 0.45                                 |

1213  
 1214  
 1215  
 1216  
 1217  
 1218  
 1219  
 1220  
 1221  
 1222  
 1223  
 1224  
 1225  
 1226  
 1227  
 1228  
 1229

1230 **Table S4. Differentially abundant genera between CDI and Non-CDI Diarrhea groups**  
 1231 **detected by ANCOM, adjusted for age and sex.** For each genus, the first column represents its  
 1232 W statistic, and subsequent four columns represent logical indicators of whether it is  
 1233 differentially abundant under a series of cutoffs (0.9, 0.8, 0.7 and 0.6). The last two columns  
 1234 represent its relative abundance (mean  $\pm$  standard deviation) in the two groups.  
 1235

| Genera                            | W_stat | detected_0.9 | detected_0.8 | detected_0.7 | detected_0.6 | Relative abundance (%) in CDI | Relative abundance (%) in Non-CDI Diarrhea |
|-----------------------------------|--------|--------------|--------------|--------------|--------------|-------------------------------|--------------------------------------------|
| <i>Clostridioides</i>             | 206    | TRUE         | TRUE         | TRUE         | TRUE         | 0.67 $\pm$ 1.80               | 0.03 $\pm$ 0.16                            |
| <i>[Eubacterium]_hallii_group</i> | 199    | TRUE         | TRUE         | TRUE         | TRUE         | 0.40 $\pm$ 2.12               | 1.14 $\pm$ 2.05                            |
| <i>Collinsella</i>                | 195    | TRUE         | TRUE         | TRUE         | TRUE         | 0.57 $\pm$ 1.59               | 2.57 $\pm$ 5.33                            |
| <i>Enterobacter</i>               | 189    | TRUE         | TRUE         | TRUE         | TRUE         | 0.79 $\pm$ 1.81               | 0.05 $\pm$ 0.20                            |
| <i>Epulopiscium</i>               | 166    | FALSE        | TRUE         | TRUE         | TRUE         | 0.06 $\pm$ 0.30               | 0.00 $\pm$ 0.01                            |
| <i>Agathobacter</i>               | 165    | FALSE        | TRUE         | TRUE         | TRUE         | 0.07 $\pm$ 0.19               | 0.42 $\pm$ 0.93                            |
| <i>Dorea</i>                      | 165    | FALSE        | TRUE         | TRUE         | TRUE         | 0.10 $\pm$ 0.26               | 0.96 $\pm$ 2.24                            |
| <i>Escherichia_Shigella</i>       | 163    | FALSE        | FALSE        | TRUE         | TRUE         | 3.54 $\pm$ 6.46               | 1.84 $\pm$ 5.01                            |
| <i>Eisenbergiella</i>             | 149    | FALSE        | FALSE        | TRUE         | TRUE         | 1.03 $\pm$ 3.36               | 0.10 $\pm$ 0.40                            |
| <i>Stenotrophomonas</i>           | 147    | FALSE        | FALSE        | TRUE         | TRUE         | 0.13 $\pm$ 0.79               | 0.09 $\pm$ 0.17                            |
| <i>Streptococcus</i>              | 147    | FALSE        | FALSE        | TRUE         | TRUE         | 6.16 $\pm$ 13.27              | 7.00 $\pm$ 7.39                            |
| <i>Dialister</i>                  | 138    | FALSE        | FALSE        | FALSE        | TRUE         | 1.10 $\pm$ 7.07               | 0.06 $\pm$ 0.25                            |
| <i>Ruminiclostridium</i>          | 137    | FALSE        | FALSE        | FALSE        | TRUE         | 0.08 $\pm$ 0.44               | 0.00 $\pm$ 0.01                            |
| <i>Fusobacterium</i>              | 131    | FALSE        | FALSE        | FALSE        | TRUE         | 0.18 $\pm$ 0.51               | 0.01 $\pm$ 0.04                            |
| <i>Klebsiella</i>                 | 131    | FALSE        | FALSE        | FALSE        | TRUE         | 1.75 $\pm$ 6.94               | 0.58 $\pm$ 2.74                            |
| <i>Veillonella</i>                | 125    | FALSE        | FALSE        | FALSE        | TRUE         | 1.86 $\pm$ 5.55               | 0.27 $\pm$ 0.78                            |

1236  
 1237  
 1238  
 1239  
 1240  
 1241  
 1242  
 1243  
 1244  
 1245  
 1246  
 1247  
 1248  
 1249  
 1250  
 1251

1252 **Table S5. Differentially abundant genera between CDI and Non-CDI groups detected by**  
 1253 **ANCOM, adjusted for age and sex.** For each genus, the first column represents its *W* statistic,  
 1254 and subsequent four columns represent logical indicators of whether it is differentially abundant  
 1255 under a series of cutoffs (0.9, 0.8, 0.7 and 0.6). The last two columns represent its relative  
 1256 abundance (mean  $\pm$  standard deviation) in the two groups.

| Genera                                       | W_stat | detected<br>_0.9 | detected_<br>0.8 | detected_<br>0.7 | detected_<br>0.6 | Relative<br>abundance<br>(%) in CDI | Relative<br>abundance (%)<br>in Non-CDI |
|----------------------------------------------|--------|------------------|------------------|------------------|------------------|-------------------------------------|-----------------------------------------|
| <i>Clostridioides</i>                        | 201    | TRUE             | TRUE             | TRUE             | TRUE             | 0.67 $\pm$ 1.81                     | 0.08 $\pm$ 0.26                         |
| <i>Veillonella</i>                           | 201    | TRUE             | TRUE             | TRUE             | TRUE             | 1.86 $\pm$ 5.58                     | 0.14 $\pm$ 0.50                         |
| <i>Enterobacter</i>                          | 200    | TRUE             | TRUE             | TRUE             | TRUE             | 0.79 $\pm$ 1.82                     | 0.08 $\pm$ 0.55                         |
| <i>Klebsiella</i>                            | 196    | TRUE             | TRUE             | TRUE             | TRUE             | 1.75 $\pm$ 6.98                     | 0.49 $\pm$ 2.25                         |
| <i>Collinsella</i>                           | 194    | TRUE             | TRUE             | TRUE             | TRUE             | 0.57 $\pm$ 1.60                     | 2.29 $\pm$ 4.64                         |
| <i>Fusobacterium</i>                         | 194    | TRUE             | TRUE             | TRUE             | TRUE             | 0.18 $\pm$ 0.51                     | 0.04 $\pm$ 0.25                         |
| <i>[Eubacterium]_hallii_group</i>            | 193    | TRUE             | TRUE             | TRUE             | TRUE             | 0.40 $\pm$ 2.13                     | 1.21 $\pm$ 2.55                         |
| <i>Stenotrophomonas</i>                      | 193    | TRUE             | TRUE             | TRUE             | TRUE             | 0.13 $\pm$ 0.79                     | 0.30 $\pm$ 1.06                         |
| <i>Escherichia_Shigella</i>                  | 191    | TRUE             | TRUE             | TRUE             | TRUE             | 3.54 $\pm$ 6.50                     | 1.96 $\pm$ 5.31                         |
| <i>[Ruminococcus]_gnavus_group</i>           | 185    | FALSE            | TRUE             | TRUE             | TRUE             | 1.73 $\pm$ 3.15                     | 0.50 $\pm$ 1.81                         |
| <i>Agathobacter</i>                          | 179    | FALSE            | TRUE             | TRUE             | TRUE             | 0.07 $\pm$ 0.19                     | 0.50 $\pm$ 1.37                         |
| <i>Dialister</i>                             | 176    | FALSE            | TRUE             | TRUE             | TRUE             | 1.10 $\pm$ 7.11                     | 0.10 $\pm$ 0.69                         |
| <i>Dorea</i>                                 | 170    | FALSE            | TRUE             | TRUE             | TRUE             | 0.10 $\pm$ 0.26                     | 0.86 $\pm$ 2.17                         |
| <i>Lactococcus</i>                           | 169    | FALSE            | TRUE             | TRUE             | TRUE             | 0.10 $\pm$ 0.30                     | 0.23 $\pm$ 0.56                         |
| <i>Anaerobacillus</i>                        | 164    | FALSE            | FALSE            | TRUE             | TRUE             | 0.02 $\pm$ 0.06                     | 0.00 $\pm$ 0.01                         |
| <i>Moryella</i>                              | 164    | FALSE            | FALSE            | TRUE             | TRUE             | 0.20 $\pm$ 1.19                     | 0.11 $\pm$ 0.26                         |
| <i>Adlercreutzia</i>                         | 162    | FALSE            | FALSE            | TRUE             | TRUE             | 0.00 $\pm$ 0.02                     | 0.08 $\pm$ 0.33                         |
| <i>Family_XIII_AD3011_group</i>              | 161    | FALSE            | FALSE            | TRUE             | TRUE             | 0.03 $\pm$ 0.07                     | 0.09 $\pm$ 0.16                         |
| <i>Erysipelatoclostridium</i>                | 160    | FALSE            | FALSE            | TRUE             | TRUE             | 3.56 $\pm$ 7.56                     | 0.80 $\pm$ 1.79                         |
| <i>[Eubacterium]_brachy_group</i>            | 154    | FALSE            | FALSE            | TRUE             | TRUE             | 0.01 $\pm$ 0.03                     | 0.04 $\pm$ 0.10                         |
| <i>Campylobacter</i>                         | 154    | FALSE            | FALSE            | TRUE             | TRUE             | 0.03 $\pm$ 0.11                     | 0.00 $\pm$ 0.00                         |
| <i>Citrobacter</i>                           | 154    | FALSE            | FALSE            | TRUE             | TRUE             | 0.41 $\pm$ 2.11                     | 0.20 $\pm$ 1.09                         |
| <i>Clostridium_sensu_stricto_1</i>           | 151    | FALSE            | FALSE            | TRUE             | TRUE             | 0.72 $\pm$ 1.76                     | 0.38 $\pm$ 1.19                         |
| <i>Clostridium_sensu_stricto_13</i>          | 151    | FALSE            | FALSE            | TRUE             | TRUE             | 0.07 $\pm$ 0.41                     | 0.00 $\pm$ 0.01                         |
| <i>Akkermansia</i>                           | 149    | FALSE            | FALSE            | TRUE             | TRUE             | 3.3 $\pm$ 9.68                      | 6.41 $\pm$ 12.03                        |
| <i>Alistipes</i>                             | 142    | FALSE            | FALSE            | FALSE            | TRUE             | 1.28 $\pm$ 3.05                     | 1.30 $\pm$ 2.34                         |
| <i>Bacillus</i>                              | 139    | FALSE            | FALSE            | FALSE            | TRUE             | 0.01 $\pm$ 0.03                     | 0.00 $\pm$ 0.01                         |
| <i>Enterorhabdus</i>                         | 137    | FALSE            | FALSE            | FALSE            | TRUE             | 0.01 $\pm$ 0.03                     | 0.08 $\pm$ 0.55                         |
| <i>Pantoea</i>                               | 137    | FALSE            | FALSE            | FALSE            | TRUE             | 0.01 $\pm$ 0.03                     | 0.00 $\pm$ 0.00                         |
| <i>Ruminococcaceae_UCG_004</i>               | 134    | FALSE            | FALSE            | FALSE            | TRUE             | 0.05 $\pm$ 0.17                     | 0.15 $\pm$ 0.41                         |
| <i>Curvibacter</i>                           | 132    | FALSE            | FALSE            | FALSE            | TRUE             | 0.01 $\pm$ 0.01                     | 0.00 $\pm$ 0.00                         |
| <i>Granulicatella</i>                        | 131    | FALSE            | FALSE            | FALSE            | TRUE             | 0.31 $\pm$ 1.11                     | 0.08 $\pm$ 0.27                         |
| <i>Lachnospiraceae_NC2004_group</i>          | 131    | FALSE            | FALSE            | FALSE            | TRUE             | 0.02 $\pm$ 0.04                     | 0.05 $\pm$ 0.09                         |
| <i>Ruminiclostridium_5</i>                   | 131    | FALSE            | FALSE            | FALSE            | TRUE             | 0.50 $\pm$ 1.11                     | 1.33 $\pm$ 2.79                         |
| <i>Epulopiscium</i>                          | 130    | FALSE            | FALSE            | FALSE            | TRUE             | 0.06 $\pm$ 0.30                     | 0.01 $\pm$ 0.04                         |
| <i>Robinsoniella</i>                         | 130    | FALSE            | FALSE            | FALSE            | TRUE             | 0.06 $\pm$ 0.33                     | 0.01 $\pm$ 0.07                         |
| <i>[Eubacterium]_coprostanoligenes_group</i> | 128    | FALSE            | FALSE            | FALSE            | TRUE             | 0.13 $\pm$ 0.39                     | 0.39 $\pm$ 2.19                         |
| <i>Eggerthella</i>                           | 128    | FALSE            | FALSE            | FALSE            | TRUE             | 1.39 $\pm$ 2.17                     | 1.86 $\pm$ 2.96                         |
| <i>Erwinia</i>                               | 126    | FALSE            | FALSE            | FALSE            | TRUE             | 0.00 $\pm$ 0.00                     | 0.00 $\pm$ 0.00                         |
| <i>[Ruminococcus]_gnavreuii_group</i>        | 124    | FALSE            | FALSE            | FALSE            | TRUE             | 0.09 $\pm$ 0.26                     | 0.45 $\pm$ 2.04                         |



1257 **Table S6. Characteristics of microbial correlation networks associated with different**  
1258 **groups.**  
1259

| <b>Groups</b>                | <b>Average degree</b> | <b>Clustering coefficient</b> | <b>Edges</b> | <b>Graph density</b> | <b>Modularity</b> | <b>Nodes</b> |
|------------------------------|-----------------------|-------------------------------|--------------|----------------------|-------------------|--------------|
| <b>Control</b>               | 9.475                 | 0.368                         | 938          | 0.048                | 0.377             | 198          |
| <b>Non-CDI Diarrhea</b>      | 11.314                | 0.474                         | 1171         | 0.055                | 0.271             | 207          |
| <b>Asymptomatic Carriage</b> | 9.730                 | 0.349                         | 973          | 0.049                | 0.442             | 200          |
| <b>CDI</b>                   | 5.200                 | 0.502                         | 299          | 0.046                | 0.568             | 115          |

1260  
1261  
1262  
1263  
1264  
1265  
1266  
1267  
1268  
1269  
1270  
1271  
1272  
1273  
1274  
1275  
1276  
1277  
1278  
1279  
1280  
1281  
1282  
1283  
1284  
1285  
1286  
1287  
1288  
1289  
1290  
1291

1292 **Table S7. Comparison of host immune markers in different groups. Mean (Q1, Q3); p-value**  
 1293 **calculated with Mann-Whitney U test.**  
 1294

| Immune markers | Control (n=45)          | Non-CDI Diarrhea (n=44) | Asymptomatic Carriage (n=35) | CDI (n=99)              | P-value (CDI vs. Asymptomatic Carriage) | P-value (CDI vs. Non-CDI Diarrhea) | P-value (CDI vs. Non-CDI) |
|----------------|-------------------------|-------------------------|------------------------------|-------------------------|-----------------------------------------|------------------------------------|---------------------------|
| IgA_toxA       | 33.63 (7.24, 62.54)     | 16.94 (8.44, 16.96)     | 44.59 (10.21, 102.50)        | 48.41 (12.10, 104)      | 0.543                                   | < 0.001                            | 0.001                     |
| IgG_toxA       | 19.87 (9.75, 22.43)     | 24.20 (11.11, 27.77)    | 22.20 (11.48, 24.86)         | 40.09 (14.77, 59.18)    | 0.009                                   | 0.002                              | < 0.001                   |
| IgM_toxA       | 2.04 (0.00, 2.87)       | 2.45 (0.00, 3.36)       | 2.15 (0.00, 2.98)            | 2.09 (0.00, 2.84)       | 0.316                                   | 0.643                              | 0.172                     |
| IgA_toxB       | 9.73 (2.68, 8.61)       | 18.78 (4.07, 19.18)     | 23.02 (5.80, 20.12)          | 35.07 (4.76, 67.79)     | 0.469                                   | 0.102                              | 0.002                     |
| IgG_toxB       | 9.66 (4.30, 9.80)       | 11.97 (5.92, 13.46)     | 13.57 (3.98, 15.98)          | 14.61 (4.92, 17.56)     | 0.980                                   | 0.870                              | 0.379                     |
| IgM_toxB       | 12.12 (2.28, 9.24)      | 13.72 (2.78, 12.77)     | 11.08 (2.74, 9.04)           | 14.99 (1.87, 10.47)     | 0.261                                   | 0.192                              | 0.256                     |
| GCSF           | 11.27 (0.46, 14.17)     | 49.37 (2.18, 29.36)     | 20.01 (2.18, 20.49)          | 386.64 (22.56, 159.95)  | < 0.001                                 | < 0.001                            | < 0.001                   |
| IL-10          | 8.29 (0.00, 3.15)       | 33.22 (0.00, 14.06)     | 9.05 (0.00, 9.78)            | 35.17 (1.63, 27.99)     | 0.002                                   | 0.021                              | < 0.001                   |
| IL-13          | 1.38 (0.00, 0.00)       | 1.97 (0.00, 0.34)       | 5.22 (0.00, 0.00)            | 9.35 (0.00, 1.09)       | 0.529                                   | 0.593                              | 0.167                     |
| IL-15          | 1.56 (0.00, 0.24)       | 2.82 (0.00, 3.28)       | 2.03 (0.00, 1.46)            | 5.22 (0.19, 5.33)       | 0.007                                   | 0.037                              | < 0.001                   |
| IL-1b          | 0.05 (0.00, 0.00)       | 0.11 (0.00, 0.00)       | 0.44 (0.00, 0.00)            | 0.7 (0.00, 0.00)        | 0.920                                   | 0.387                              | 0.159                     |
| IL-2           | 0.04 (0.00, 0.00)       | 0.05 (0.00, 0.00)       | 0.45 (0.00, 0.00)            | 1.4 (0.00, 0.00)        | 0.630                                   | 0.151                              | 0.051                     |
| IL-4           | 1.88 (0.00, 0.00)       | 9.58 (2.57, 12.44)      | 5.73 (0.00, 0.00)            | 11.54 (0.00, 9.12)      | 0.002                                   | 0.011                              | 0.032                     |
| IL-6           | 15.78 (0.00, 3.77)      | 24.97 (0.00, 10.71)     | 9.52 (0.00, 5.46)            | 47.09 (2.52, 37.71)     | < 0.001                                 | < 0.001                            | < 0.001                   |
| IL-8           | 100.51 (12.37, 59.19)   | 80.85 (15.22, 73.45)    | 59.78 (10.33, 44.76)         | 128.05 (27.20, 122.24)  | < 0.001                                 | 0.004                              | < 0.001                   |
| MCPI           | 477.00 (397.19, 545.00) | 591.61 (399.55, 779.32) | 613.28 (430.85, 791.37)      | 844.96 (522.41, 990.98) | 0.053                                   | 0.020                              | < 0.001                   |
| TNFa           | 8.61 (6.20, 10.95)      | 21.76 (8.93, 21.22)     | 12.45 (4.91, 14.84)          | 26.68 (13.88, 28.94)    | < 0.001                                 | 0.006                              | < 0.001                   |
| VEGFA          | 102.78 (35.76, 118.27)  | 109.85 (34.53, 127.69)  | 118.44 (27.54, 188.60)       | 125.93 (19.54, 140.49)  | 0.499                                   | 0.603                              | 0.390                     |

1295  
 1296  
 1297  
 1298  
 1299  
 1300  
 1301  
 1302  
 1303  
 1304  
 1305  
 1306  
 1307  
 1308  
 1309  
 1310  
 1311  
 1312  
 1313  
 1314  
 1315

1316 **Table S8. Accuracy, Precision, Recall and F1-score of symbolic classification in CDI**  
1317 **diagnosis.** CDI subjects were considered as either true positive or true negative. Results shown  
1318 in the parenthesis represents the latter case. The performance of the symbolic classification  
1319 model evaluated by cross-validation. We randomly split the dataset to form a training set (80%  
1320 of the data) and a test set (20% of the data) in 10 different ways. Each time, for each  
1321 classification task (diagnostic goal), we learned the SC model from the training dataset and  
1322 evaluated it on the test dataset. Data represents as mean  $\pm$  standard deviation.  
1323

| <b>Diagnostic goal</b>              | <b>Accuracy</b>   | <b>Precision</b>                         | <b>Recall</b>                            | <b>F1-score</b>                          |
|-------------------------------------|-------------------|------------------------------------------|------------------------------------------|------------------------------------------|
| CDI vs.<br>Asymptomatic<br>Carriage | 0.873 $\pm$ 0.085 | 0.878 $\pm$ 0.101<br>(0.857 $\pm$ 0.180) | 0.963 $\pm$ 0.043<br>(0.639 $\pm$ 0.229) | 0.915 $\pm$ 0.061<br>(0.718 $\pm$ 0.185) |
| CDI vs. Non-<br>CDI Diarrhea        | 0.883 $\pm$ 0.036 | 0.899 $\pm$ 0.078<br>(0.865 $\pm$ 0.098) | 0.912 $\pm$ 0.070<br>(0.847 $\pm$ 0.110) | 0.901 $\pm$ 0.039<br>(0.846 $\pm$ 0.055) |
| CDI vs. Non-<br>CDI                 | 0.818 $\pm$ 0.040 | 0.770 $\pm$ 0.102<br>(0.861 $\pm$ 0.059) | 0.784 $\pm$ 0.120<br>(0.839 $\pm$ 0.091) | 0.769 $\pm$ 0.074<br>(0.845 $\pm$ 0.036) |

1324  
1325  
1326
